# Supplementary material for: Multi-step chirality transfer and racemization kinetics of pillar [5]arenes by tuning the halogen substituents on the rims
Source: Royal Society of Chemistry journal article supplement (doi:10.1039/d4qo01799d), 2024-01-01
Supplement: d4qo01799d1.pdf [file d4qo01799d1.pdf]

## Supporting Information for

# Multistep Chirality Transfer in Pillar[5]arene with Halogen-modulated Flipping Kinetics of Ring Units

Lizhi Fang,<sup>a</sup> Xiaowen Guan,<sup>a</sup> Yanling Shen,<sup>a</sup> Dayang Zhou,<sup>b</sup> Long Chen,<sup>a</sup> Xiaochuan Chen,<sup>\*a</sup> Wanhua Wu,<sup>a</sup> Leyong Wang,<sup>\*c</sup> and Cheng Yang<sup>\*a</sup>

---

<sup>a</sup> Key Laboratory of Green Chemistry & Technology of Ministry of Education, College of Chemistry Institution, Sichuan University, Chengdu 610064, China. E-mail: [chenxc@scu.edu.cn](mailto:chenxc@scu.edu.cn); [wuwanhua@scu.edu.cn](mailto:wuwanhua@scu.edu.cn); [yangchengyc@scu.edu.cn](mailto:yangchengyc@scu.edu.cn)

<sup>b</sup> Comprehensive Analysis Center, ISIR and Department of Applied Chemistry, Osaka University, Yamada-oka, Suita 565-0871, Japan.

<sup>c</sup> State Key Laboratory of Analytical Chemistry for Life Science, Jiangsu Key Laboratory of Advanced Organic Materials, School of Chemistry and Chemical Engineering, Nanjing University, Nanjing, China. E-mail: [lywang@nju.edu.cn](mailto:lywang@nju.edu.cn)

---

### Contents

|                                                                               |                |
|-------------------------------------------------------------------------------|----------------|
| <b>1 General information</b>                                                  | <b>S2</b>      |
| <b>2 Synthesis and structure characterization data of the host</b>            | <b>S2-S4</b>   |
| <b>3 NMR and HRMS spectra</b>                                                 | <b>S5-S13</b>  |
| <b>4 The racemization kinetics and thermodynamics of P3-P5</b>                | <b>S13-S19</b> |
| <b>5 The chiral recognition of P5</b>                                         | <b>S20-S24</b> |
| <b>6 The X-ray single crystal analyses of P1-P5</b>                           | <b>S24-S34</b> |
| <b>7 Chiral guest induces P5 molecules</b>                                    | <b>S34-S35</b> |
| <b>8 Calculations for complexation between the P5<sub>R/S</sub> and L-Ser</b> | <b>S35-S42</b> |

## 1 General information

Chemicals and instruments: All of the chemicals used for synthesis were analytically pure and were used as received. Solvents were dried and distilled before use for synthesis.  $^1\text{H}$  NMR and  $^{13}\text{C}$  NMR spectra were recorded at room temperature on a Bruker AMX-400 (operating at 400 MHz for  $^1\text{H}$  NMR and 101 MHz for  $^{13}\text{C}$  NMR) in  $\text{CDCl}_3$  and/or  $\text{CD}_3\text{OD}$  with TMS as internal standard. HRMS were measured with a Waters-Q-TOF Premiers (ESI). Single crystal X-ray data sets were collected on a Bruker D8 Venture rotating anode diffractometer. UV-vis spectra were obtained on JASCO V-650. CD spectra and binding constants with CD titration were acquired using J1500 CD spectrometer.

The single crystal structure of P1-P5 can be found at the Cambridge Crystallographic Data Centre, CCDC numbers: 2323526, 2323535, 2323538, 2323573, 2323543. All the chemicals were obtained from suppliers, used without further purification in case of analysis investigation. Solvents were distilled before used for analysis.

## 2 Synthesis and structure characterization data of the host

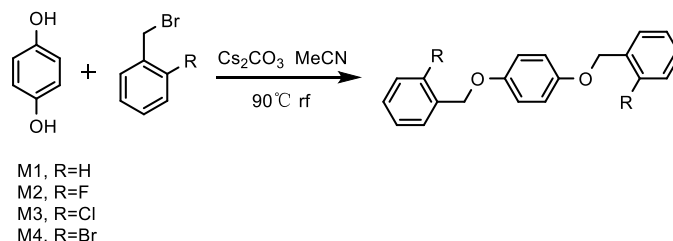

### Synthesis of M1-M4

Hydroquinone (30 mmol, 3.32 g),  $\text{Cs}_2\text{CO}_3$  (75 mmol, 24.44 g), and 2-halogen phenyl bromide (60 mmol) were mixed and refluxed in acetonitrile (300 mL) under a nitrogen atmosphere for 12 h. After cooling, the reaction mixture was filtered and evaporated to give a white solid. The crude product was purified on a silica gel column (PE/DCM= 1/1, v/v), and the eluent was removed under vacuum to give compound **M1-M4** as a white solid (yield: 80%).

**M1:**  $^1\text{H}$  NMR (400 MHz,  $\text{CDCl}_3$ )  $\delta$  7.45 – 7.32 (m, 10H), 6.91 (s, 4H), 5.02 (s, 4H). <sup>1</sup>

**M2:**  $^1\text{H}$  NMR (400 MHz,  $\text{CDCl}_3$ )  $\delta$  7.55 – 7.50 (m, 2H), 7.33 (ddd,  $J = 7.6, 5.7, 3.6$  Hz, 2H), 7.18 (td,  $J = 7.5, 1.0$  Hz, 2H), 7.13 – 7.08 (m, 2H), 6.95 (s, 4H), 5.11 (s, 4H).  $^{13}\text{C}$  NMR (101 MHz,  $\text{CDCl}_3$ )  $\delta$  161.80, 159.35, 153.20, 129.86, 129.82, 129.77, 129.69, 124.37, 124.34, 116.01, 115.54, 115.33, 64.52, 64.48.

**M3:**  $^1\text{H}$  NMR (400 MHz,  $\text{CDCl}_3$ )  $\delta$  7.58 (dd,  $J = 7.3, 1.9$  Hz, 2H), 7.42 (dd,  $J = 7.4, 1.8$  Hz, 2H), 7.34 – 7.29 (m, 4H), 6.96 (s, 4H), 5.15 (s, 4H).  $^{13}\text{C}$  NMR (101 MHz,  $\text{CDCl}_3$ )  $\delta$  153.18, 135.09, 132.69, 129.47, 129.03, 128.92, 127.07, 116.02, 67.94.

**M4:**  $^1\text{H}$  NMR (400 MHz,  $\text{CDCl}_3$ )  $\delta$  7.64 – 7.56 (m, 1H), 7.36 (td,  $J = 7.6, 0.9$  Hz, 1H), 7.21 (td,  $J = 7.9, 1.6$  Hz, 1H), 6.96 (s, 1H), 5.12 (s, 1H).  $^{13}\text{C}$  NMR (101 MHz,  $\text{CDCl}_3$ )  $\delta$  153.15, 136.67, 132.73, 129.31, 129.03, 127.68, 122.42, 116.04, 77.36, 70.22.

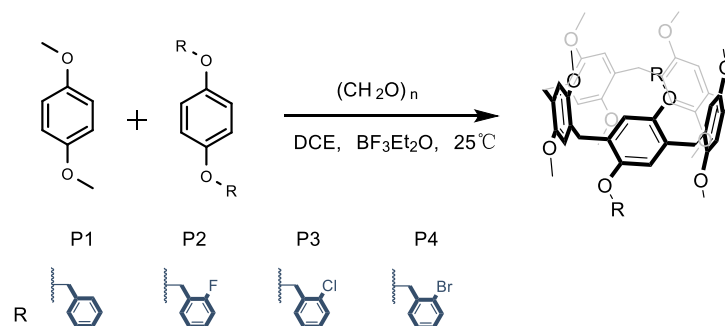

## Synthesis of Pn

**Mn** (2.00 g, 6.89 mmol), 1,4-dimethoxybenzene (5.71 g, 6 equiv), and paraformaldehyde (1.54 g, 21 equiv) were mixed in DCE at  $25^\circ\text{C}$ , stirring for five minutes and then adding boron trifluoride ether (4 ml). At the end of the reaction, washed with saturated sodium bicarbonate three times, the organic phase was dried over  $\text{Na}_2\text{SO}_4$ , and the solvent was removed under reduced pressure. The crude product was purified on a silica gel column, and the eluent was removed under vacuum to give **Pn** as a white solid.

**P1**: The crude product was purified on a silica gel column (PE/DCM= 2/1, v/v), and the eluent was removed under vacuum to give compound **P1** as a white solid (yield: 30%).  $^1\text{H}$  NMR (400 MHz,  $\text{CDCl}_3$ )  $\delta$  7.44 – 7.41 (m, 4H), 7.35 (d,  $J = 6.3$  Hz, 6H), 6.93 (s, 2H), 6.81 (s, 2H), 6.76 (s, 2H), 6.75 (s, 2H), 6.71 (s, 2H), 4.95 (s, 4H), 3.92 (d,  $J = 19.7$  Hz, 2H), 3.78 (s, 2H), 3.75 (s, 4H), 3.71 (d,  $J = 7.1$  Hz, 2H), 3.68 (s, 6H), 3.66 (s, 6H), 3.57 (s, 6H), 3.33 (s, 6H).  $^{13}\text{C}$  NMR (101 MHz,  $\text{CDCl}_3$ )  $\delta$  150.85, 150.78, 150.71, 150.15, 138.19, 128.95, 128.63, 128.54, 128.42, 128.36, 128.26, 128.07, 127.68, 127.31, 115.05, 114.06, 114.04, 113.97, 113.92, 70.39, 55.88, 55.83, 55.70, 55.41, 53.14, 39.62, 29.87, 29.77, 29.48, 27.06, 14.27. ESI -HRMS:  $m/z$  called for  $[\text{C}_{57}\text{H}_{59}\text{O}_{10}]^+$ ,  $[\text{M}+\text{H}]^+$ : 903.4108, found: 903.4106;  $[\text{C}_{57}\text{H}_{62}\text{NO}_{10}]^+$ ,  $[\text{M}+\text{NH}_4]^+$ : 920.4374, found: 920.4348.

**P2**: The crude product was purified on a silica gel column (PE/DCM= 3/1, v/v), and the eluent was removed under vacuum to give compound **P2** as a white solid (yield: 46%).  $^1\text{H}$  NMR (400 MHz,  $\text{CDCl}_3$ )  $\delta$  7.50 (t,  $J = 6.9$  Hz, 2H), 7.32 (dd,  $J = 10.6, 4.8$  Hz, 2H), 7.14 – 7.06 (m, 4H), 6.98 (s, 2H), 6.84 (s, 2H), 6.77 (d,  $J = 3.9$  Hz, 4H), 6.72 (s, 2H), 5.07 (s, 4H), 3.93 (d,  $J = 12.6$  Hz, 2H), 3.79 (d,  $J = 11.2$  Hz, 8H), 3.71 (s, 6H), 3.68 (s, 6H), 3.61 (s, 6H), 3.40 (s, 6H).  $^{13}\text{C}$  NMR (101 MHz,  $\text{CDCl}_3$ )  $\delta$  150.88, 150.74, 150.70, 150.62, 150.03, 129.45, 129.40, 129.31, 129.23, 128.75, 128.44, 128.36, 128.26, 127.90, 125.42, 125.28, 124.34, 124.30, 115.28, 115.17, 115.07, 114.16, 113.91, 113.84, 113.79, 77.36, 64.28, 64.23, 55.91, 55.78, 55.50, 55.38, 53.09, 29.79, 29.75, 29.44. ESI-HRMS:  $m/z$  called for  $[\text{C}_{57}\text{H}_{57}\text{F}_2\text{O}_{10}]^+$ ,  $[\text{M}+\text{H}]^+$ : 939.3920, found: 939.3918;  $[\text{C}_{57}\text{H}_{60}\text{NO}_{10}]^+$ ,  $[\text{M}+\text{NH}_4]^+$ : 956.4185, found: 956.4172.

**P3**: The crude product was purified on a silica gel column (PE/DCM= 1/2, v/v), and the eluent was removed under vacuum to give compound **P3** as a white solid (yield: 40%).  $^1\text{H}$  NMR (400 MHz,  $\text{CDCl}_3$ )  $\delta$  7.53 (d,  $J = 7.6$  Hz, 2H), 7.41 (d,  $J = 8.9$  Hz, 2H), 7.24 (d,  $J = 7.6$  Hz, 2H), 7.13 (d,  $J = 7.6$  Hz, 2H), 6.97 (s, 2H), 6.85 (s, 2H), 6.77 – 6.74 (m, 6H), 5.10 (d,  $J = 12.3$  Hz, 4H), 3.95 (d,  $J = 12.8$  Hz, 2H), 3.81 (s, 2H), 3.77 (d,  $J = 7.4$  Hz, 6H), 3.71 (s, 6H), 3.66 (s, 6H), 3.58 (s, 6H), 3.38 (s, 6H).  $^{13}\text{C}$  NMR (101 MHz,  $\text{CDCl}_3$ )  $\delta$  150.96, 150.73, 150.55, 149.93, 135.82, 132.06,

129.20, 128.68, 128.63, 128.47, 128.45, 128.35, 128.17, 127.74, 127.03, 115.27, 114.31, 113.89, 113.79, 113.72, 77.36, 67.60, 55.94, 55.77, 55.39, 29.87, 29.34. ESI -HRMS: m/z called for  $[C_{57}H_{57}Cl_2O_{10}]^+$ ,  $[M+H]^+$ : 971.3328, found: 971.3325;  $[C_{57}H_{60}Cl_2NO_{10}]^+$ ,  $[M+NH_4]^+$ : 988.3594, found: 988.3577.

### Synthesis of P4 and P5

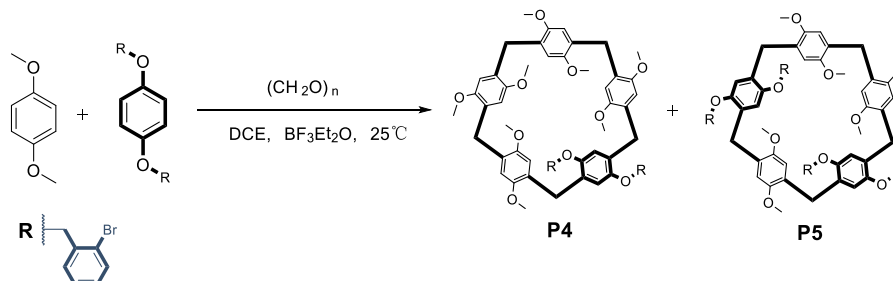

The synthesis route is similar to **P1**. **M4** (2.0 g, 4.46 mmol), 1,4-dimethoxybenzene (3.85 g, 6 equiv). The crude product was purified on a silica gel column (PE/DCM= 1/1, V/V), and the eluent was removed under vacuum to give compounds **P4** and **P5** as white solid.

**P4**: yield 30%,  $^1H$  NMR (400 MHz,  $CDCl_3$ ):  $\delta$  7.60 (dd,  $J = 7.4, 1.8$  Hz, 2H), 7.50 (d,  $J = 6.9$  Hz, 2H), 7.17 (dd,  $J = 8.8, 4.5$  Hz, 4H), 6.96 (s, 2H), 6.86 (s, 2H), 6.76 (d,  $J = 7.5$  Hz, 6H), 5.24 (s, 4H), 3.80 (s, 2H), 3.77 (s, 4H), 3.73 (s, 2H), 3.72 (s, 6H), 3.72 (s, 2H), 3.67 (s, 6H), 3.58 (s, 6H), 3.39 (s, 6H).  $^{13}C$  NMR (101 MHz,  $CDCl_3$ )  $\delta$  151.00, 150.74, 150.55, 149.86, 137.33, 132.43, 128.92, 128.66, 128.60, 128.50, 128.35, 128.15, 127.71, 127.63, 121.73, 115.28, 114.37, 113.91, 113.81, 113.73, 77.36, 69.85, 55.99, 55.81, 55.46, 55.43, 29.89, 29.32. ESI-HRMS: m/z called for  $[C_{57}H_{57}Br_2O_{10}]^+$ ,  $[M+H]^+$ : 1059.2318, found: 1059.2316;  $[C_{57}H_{60}Br_2NO_{10}]^+$ ,  $[M+NH_4]^+$ : 1076.2584, found: 1076.2568.

**P5**: yield 15%,  $^1H$  NMR (400 MHz,  $CDCl_3$ ):  $\delta$  7.58 (d,  $J = 7.1$  Hz, 2H), 7.49 (d,  $J = 6.8$  Hz, 2H), 7.15 (d,  $J = 7.0$  Hz, 4H), 6.94 (s, 2H), 6.84 (s, 2H), 6.75 (d,  $J = 7.4$  Hz, 6H), 5.11 – 5.00 (m, 4H), 3.95 (d,  $J = 12.8$  Hz, 2H), 3.78 (dd,  $J = 12.6, 8.7$  Hz, 8H), 3.70 (s, 6H), 3.65 (s, 6H), 3.57 (s, 6H), 3.37 (s, 6H).  $^{13}C$  NMR (101 MHz,  $CDCl_3$ )  $\delta$  150.79, 150.47, 149.92, 149.74, 137.32, 132.52, 128.99, 128.55, 127.76, 127.60, 121.84, 115.45, 115.03, 113.97, 113.59, 77.36, 69.97, 69.77, 55.47, 55.19, 29.96, 29.49. ESI -HRMS: m/z called for m/z  $[C_{57}H_{60}Br_2NO_{10}]^+$ ,  $[M+NH_4]^+$ : 1384.1420, found: 1384.1451

### 3 NMR and HRMS spectra

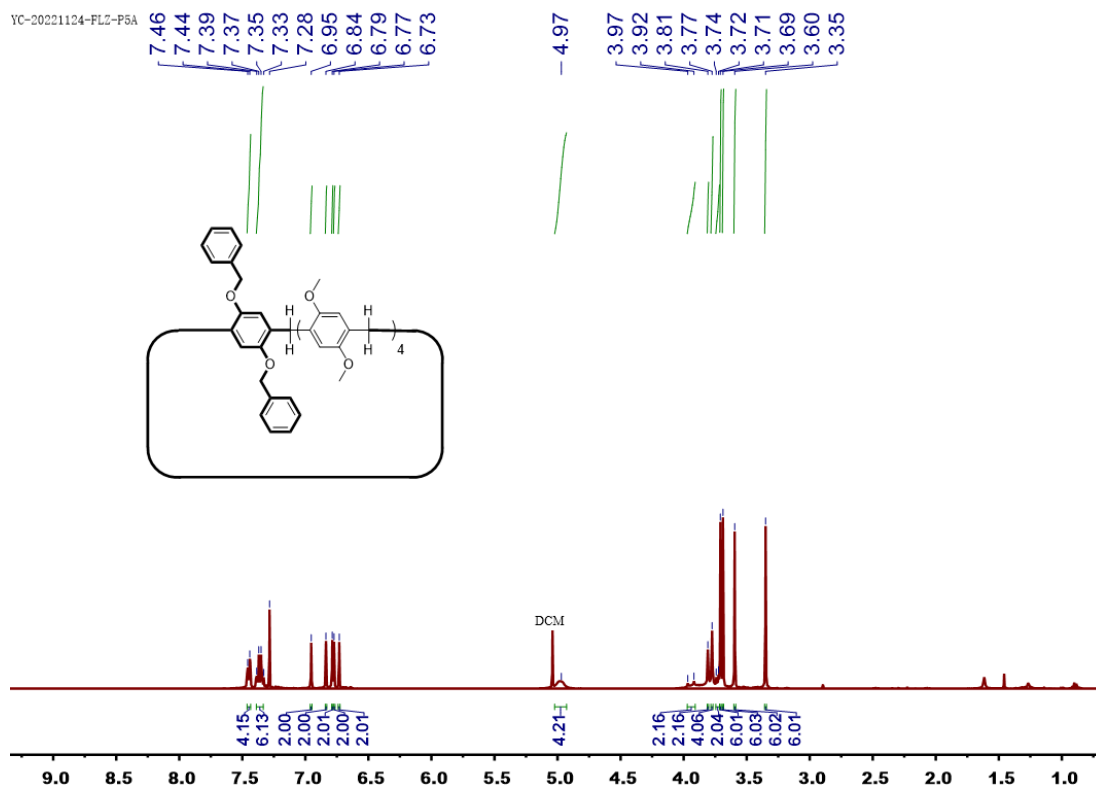

Figure S1. <sup>1</sup>H NMR spectrum (400 MHz, chloroform-d, room temperature) of **P1**.

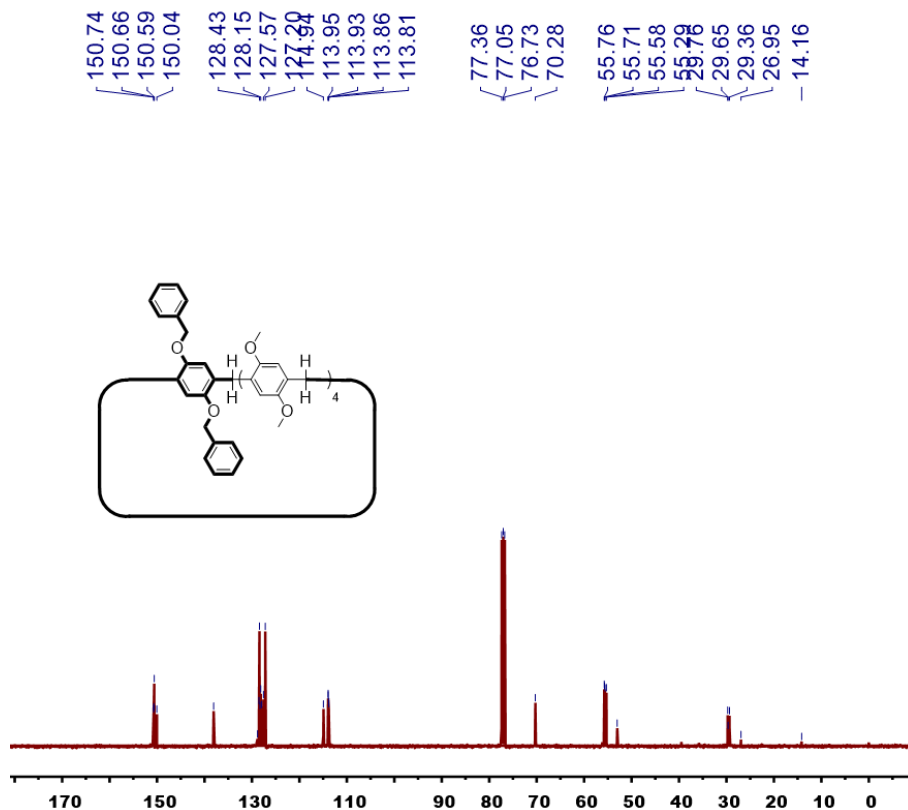

Figure S2. <sup>13</sup>C NMR spectrum (101 MHz, chloroform-d, room temperature) of **P1**.

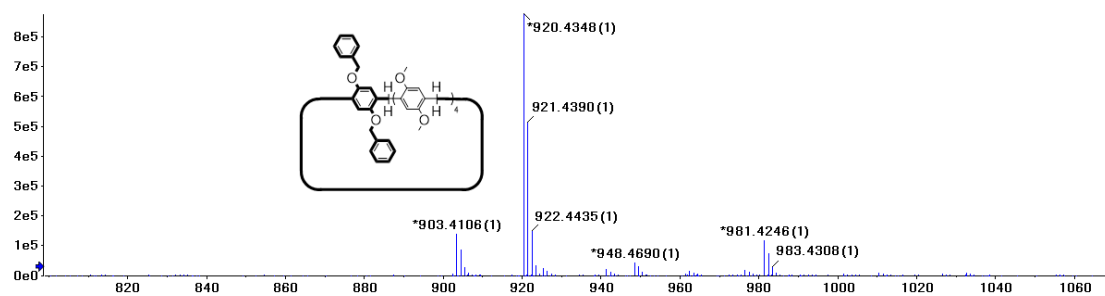

Figure S3. ESI-HRMS spectrum of **P1**. Assignment of main peaks:  $m/z$   $[C_{57}H_{59}O_{10}]^+$ ,  $[M+H]^+$ : 903.4018, found: 903.4106;  $[C_{57}H_{62}NO_{10}]^+$ ,  $[M+NH_4]^+$ : 920.4374, found: 920.4348.

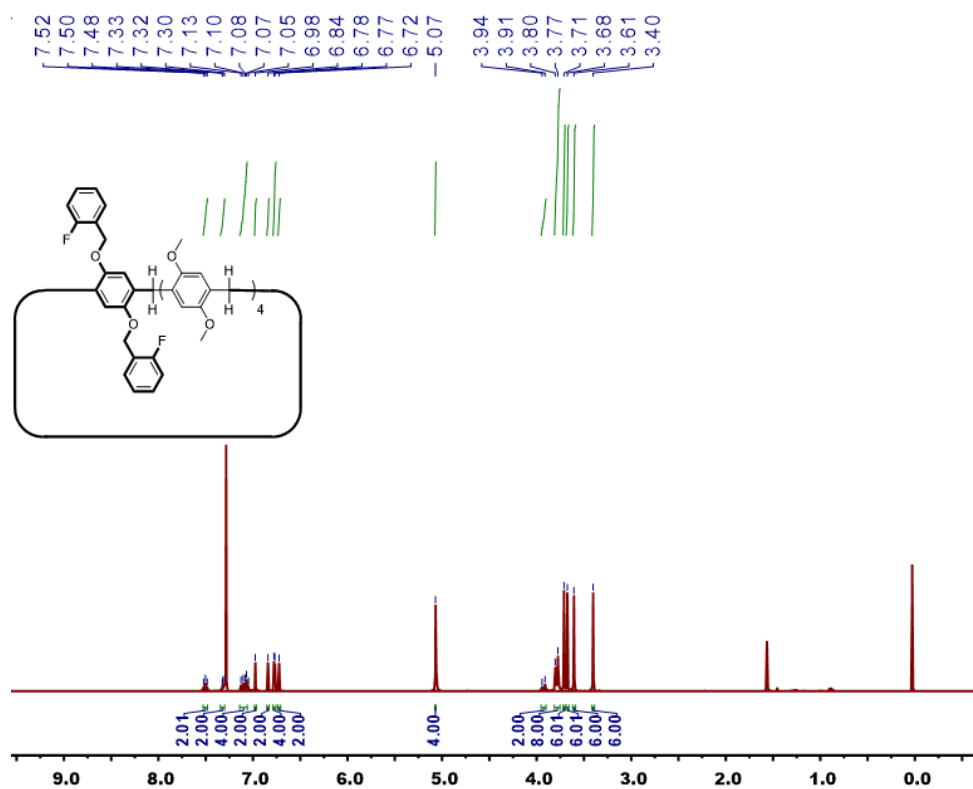

Figure S4.  $^1H$  NMR spectrum (400 MHz, chloroform-d, room temperature) of **P2**.

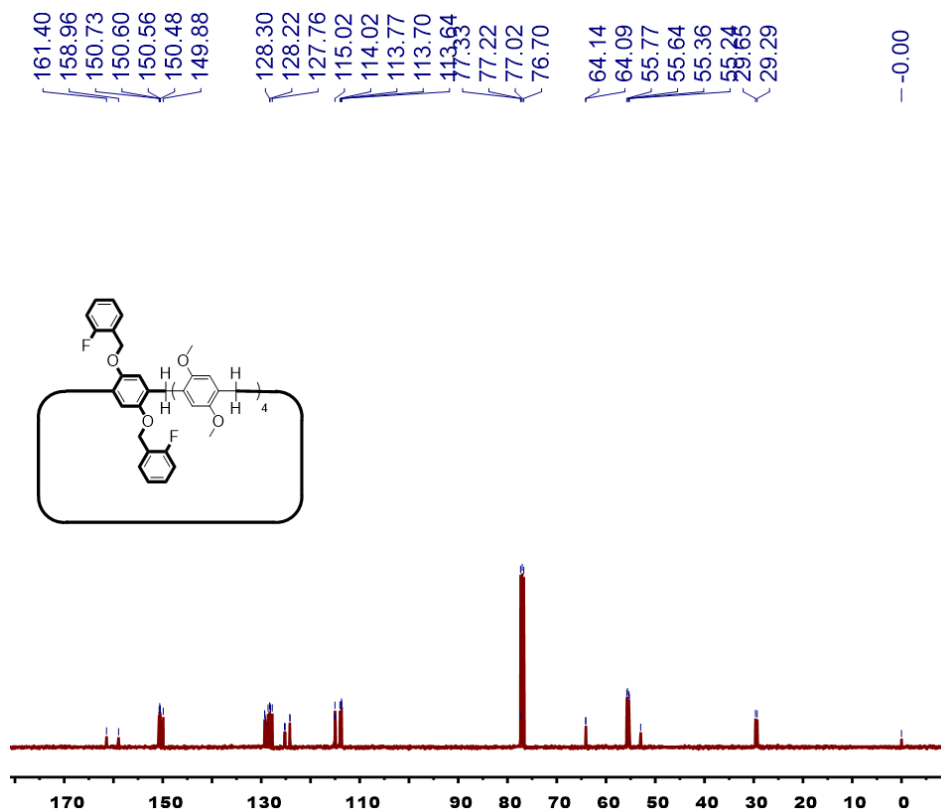

Figure S5.  $^{13}\text{C}$  NMR spectrum (101 MHz, chloroform-d, room temperature) of **P2**.

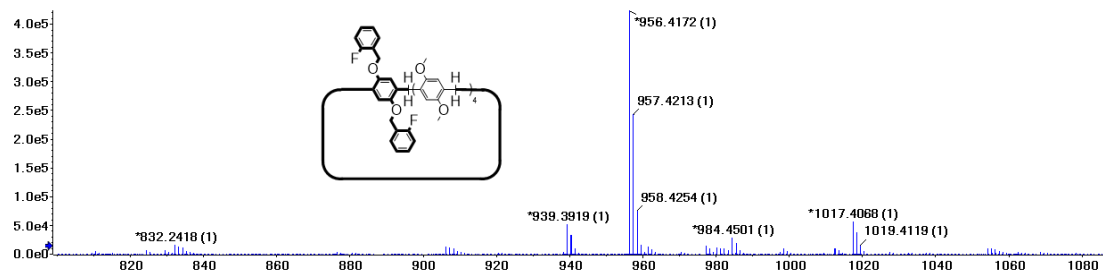

Figure S6. ESI-HRMS spectrum of P2. Assignment of main peaks:  $m/z$   $[\text{C}_{57}\text{H}_{57}\text{F}_2\text{O}_{10}]^+$ ,  $[\text{M}+\text{H}]^+$ : 939.3920, found: 939.3918;  $[\text{C}_{57}\text{H}_{60}\text{NO}_{10}]^+$ ,  $[\text{M}+\text{NH}_4]^+$ : 956.4185, found: 956.4172

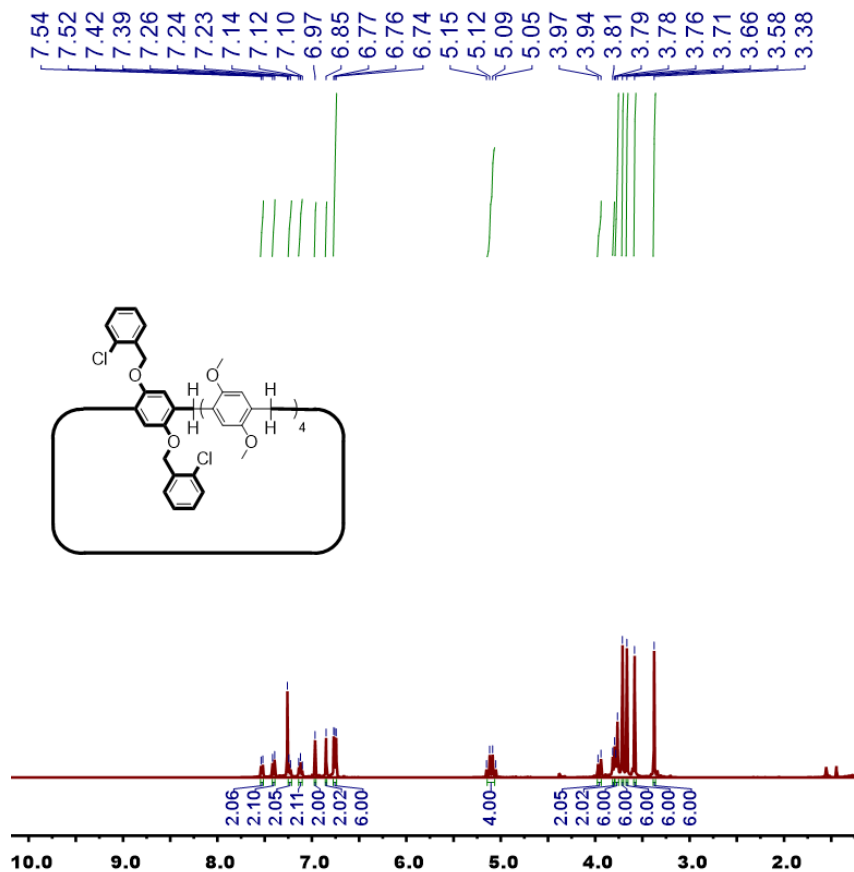

Figure S7.  $^1\text{H}$  NMR spectrum (400 MHz, chloroform- $d$ , room temperature) of **P3**.

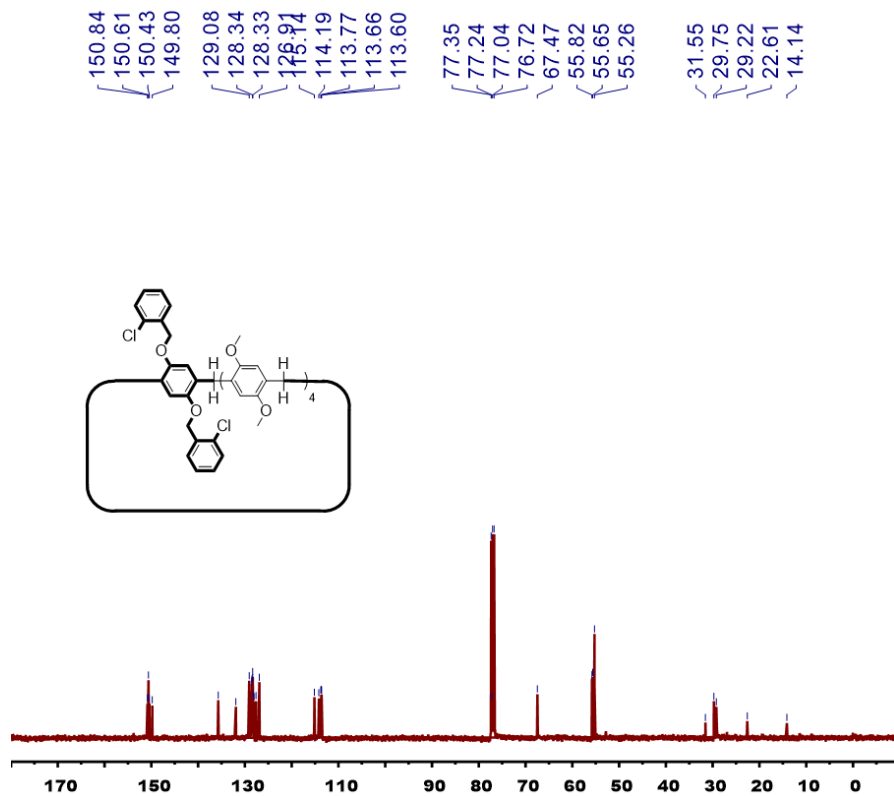

Figure S8.  $^{13}\text{C}$  NMR spectrum (101 MHz, chloroform- $d$ , room temperature) of **P3**.



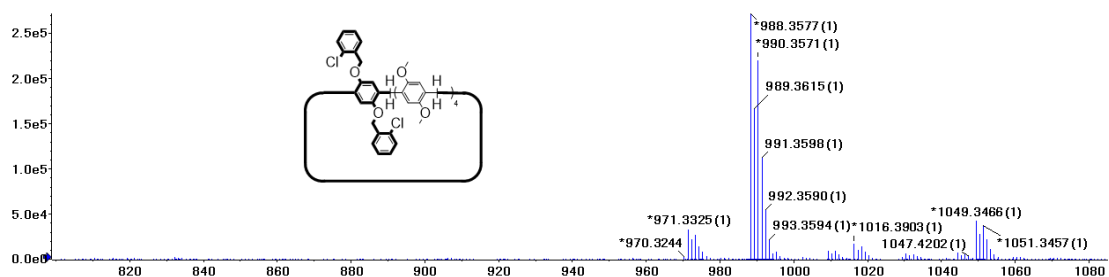

Figure S9. ESI-HRMS spectrum of **P3**. Assignment of main peaks:  $m/z$   $[C_{57}H_{57}Cl_2O]^{+}$ ,  $[M+H]^{+}$ : 971.3320, found: 971.3325;  $[C_{57}H_{60}Cl_2NO]^{+}$ ,  $[M+NH_4]^{+}$ : 988.3594, found: 988.3577.

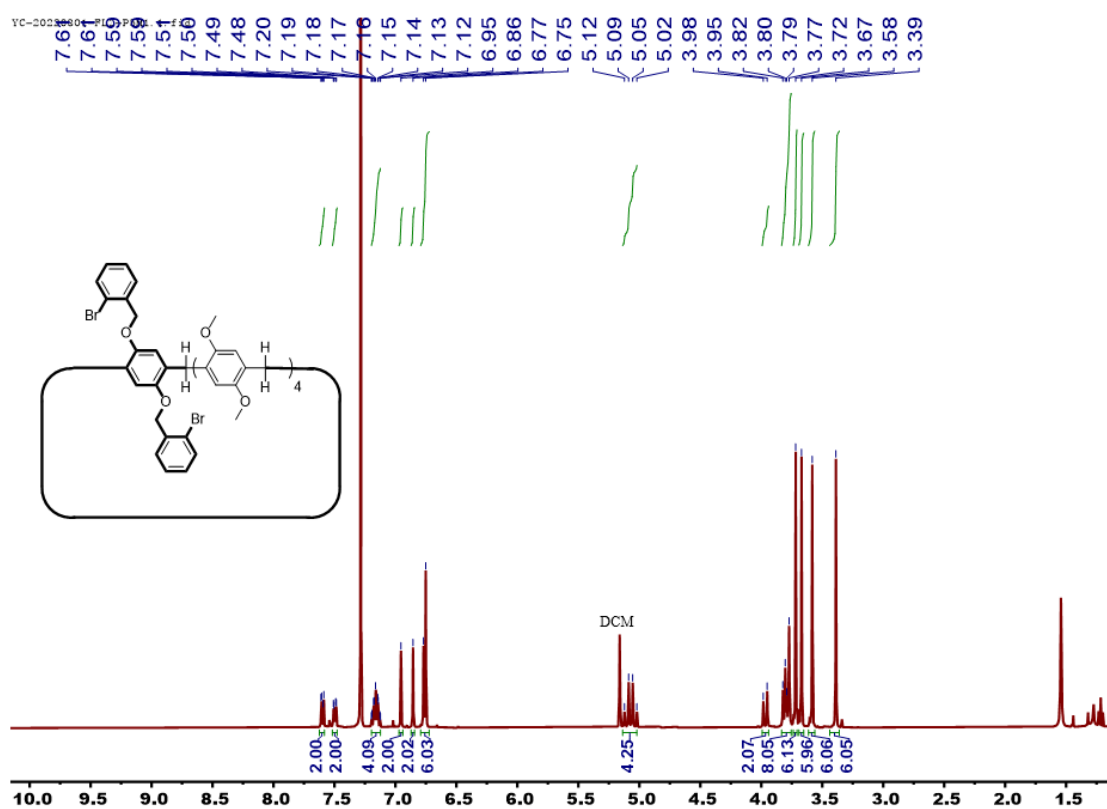

Figure S10.  $^1H$  NMR spectrum (400 MHz, chloroform-d, room temperature) of **P4**.

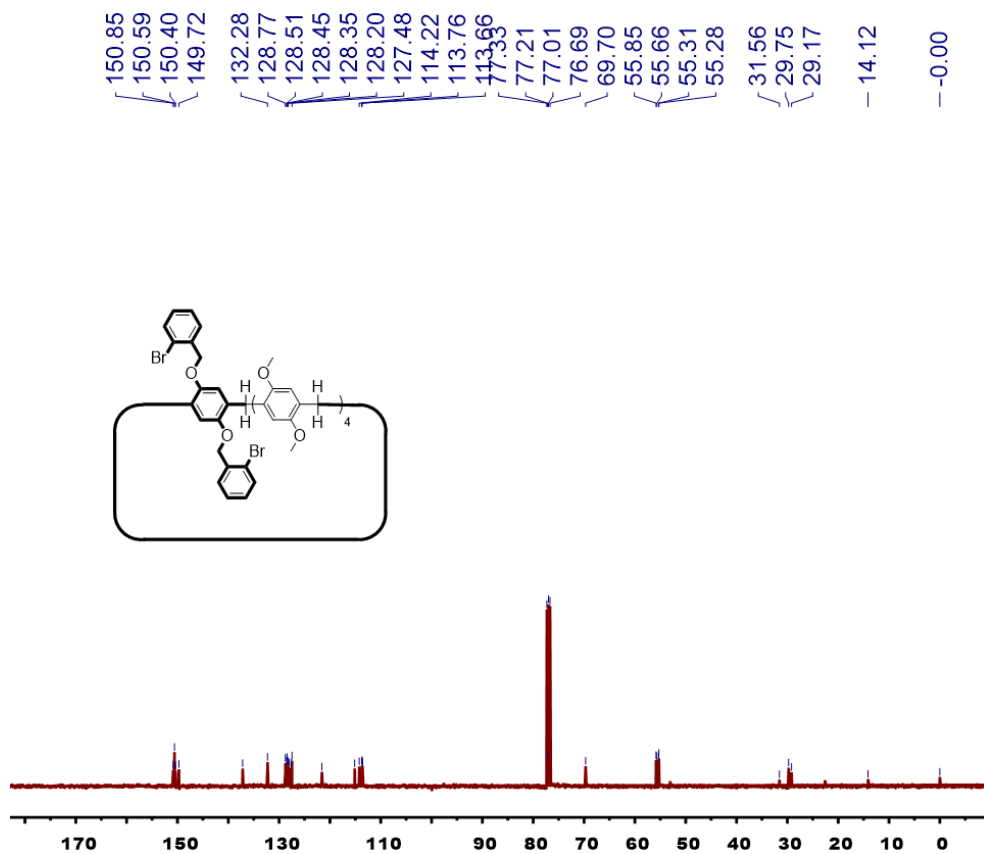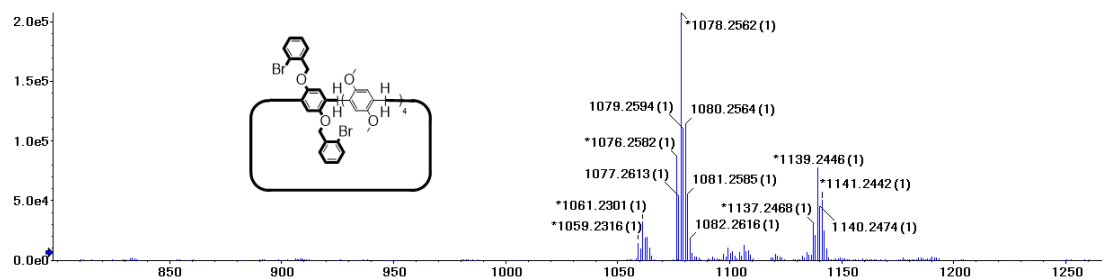

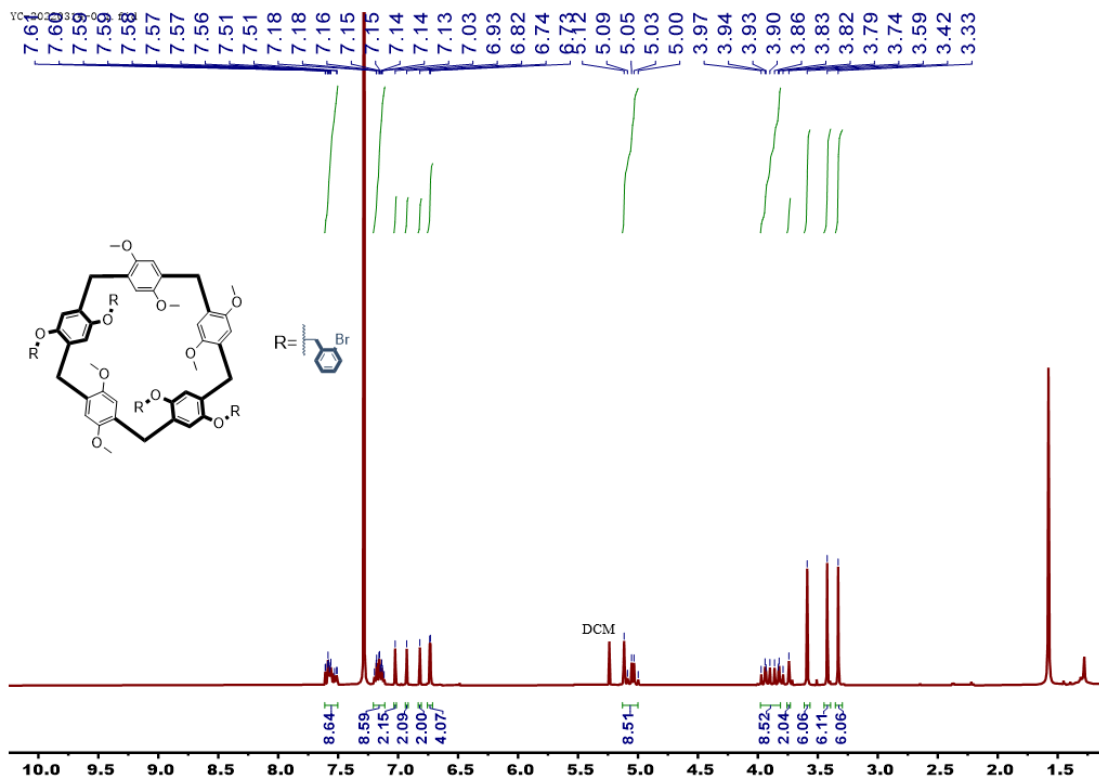

Figure S13. <sup>1</sup>H NMR spectrum (400 MHz, chloroform-d, room temperature) of **P5**.

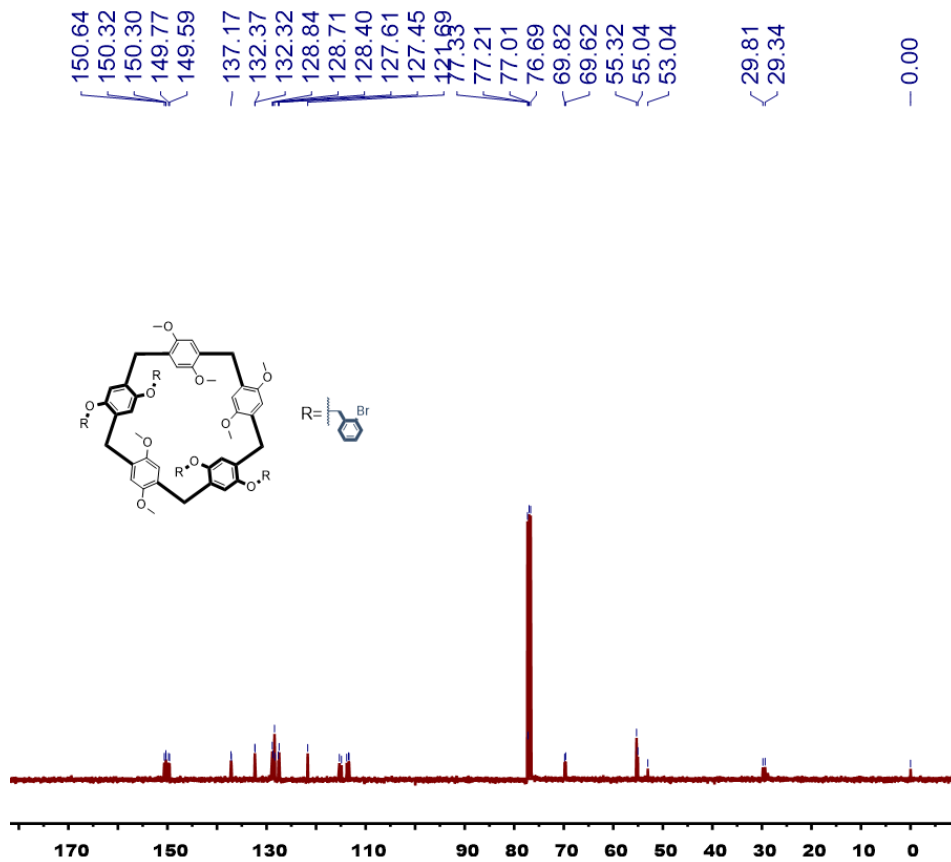

Figure S14. <sup>13</sup>C NMR spectrum (101 MHz, chloroform-d, room temperature) of **P5**.

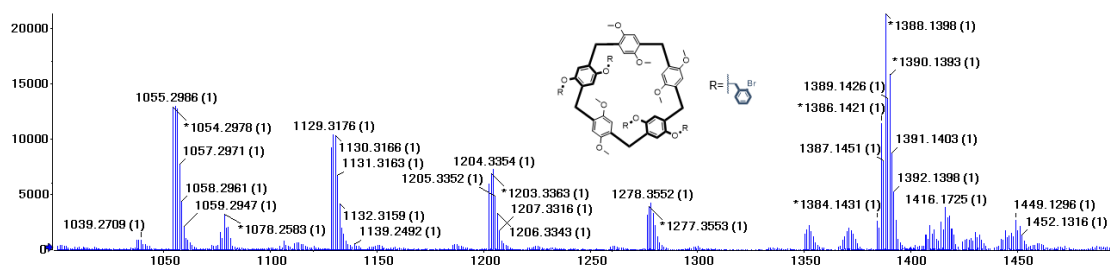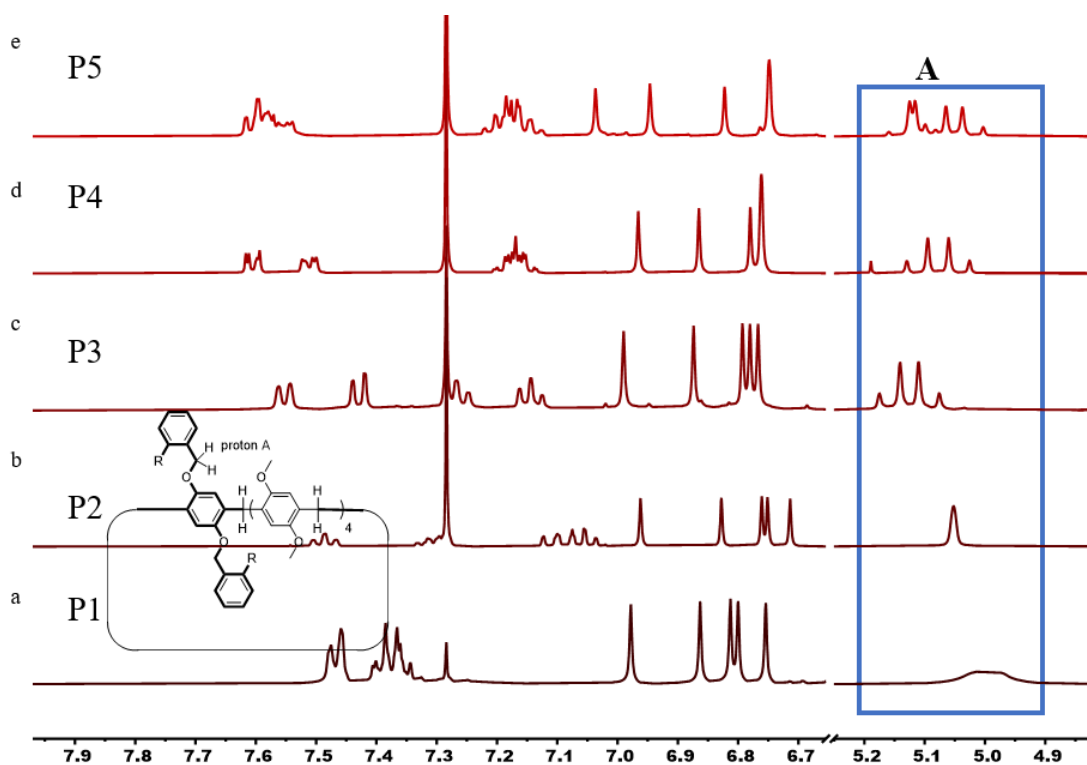

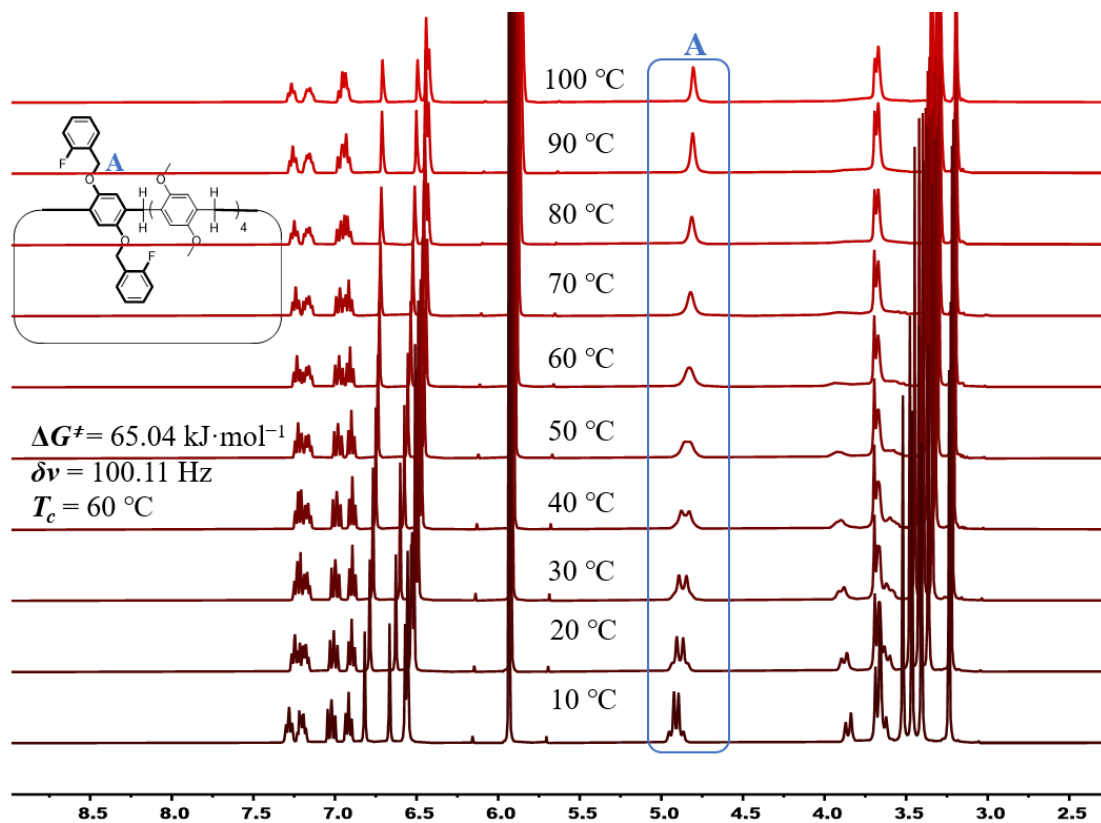

Figure S17.  $^1\text{H}$  NMR spectrum (400 MHz, 1,1,2,2-Tetrachloroethane- $d_2$ ) of **P2** at various temperatures and racemization thermokinetic parameters of **P2**  $\Delta G^\ddagger = 8.314T_c[22.96 + \log(T_c / \delta\nu)]$ .

#### 4 The racemization kinetics and thermodynamics of P3-P5

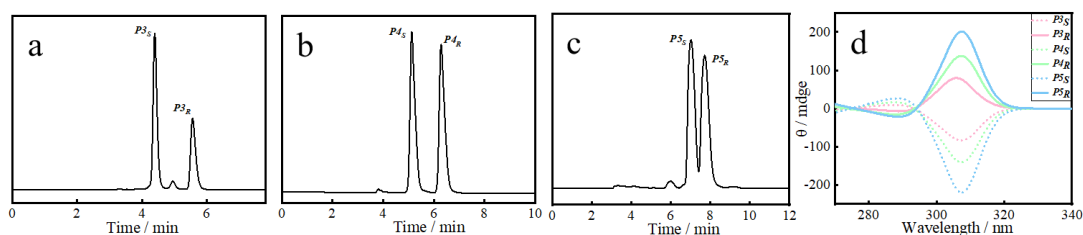

Figure S18. Chiral HPLC traces of (a) **P3** eluted with DCM: hexane, 1:2 (v / v), (b) **P4** eluted with DCM: hexane, 1:2 (v / v) and (c) **P5** eluted with DCM: hexane, 1:3 (v / v) and (d) CD spectra of **P3** $_{R/S}$ , **P4** $_{R/S}$  and **P5** $_{R/S}$  at room temperature ( $[M] = 0.05$  mM) in chloroform.

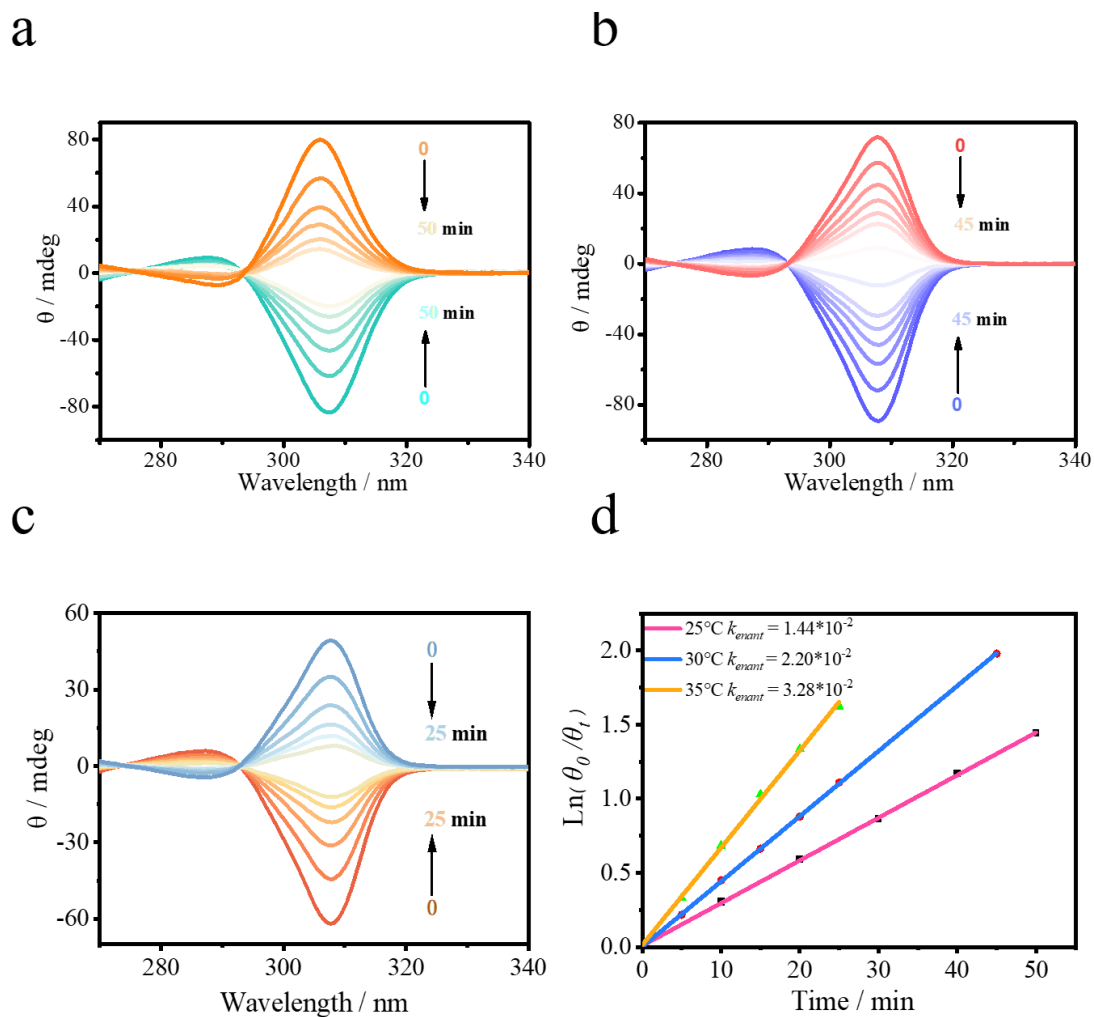

Figure S19. Time-dependent CD spectral changes of **P3** in chloroform ( $[\mathbf{P3}] = 0.05 \text{ mM}$ ) (a) at 25 °C, (b) at 30 °C, (c) at 35 °C. (d) Kinetic fittings of **P3** at various temperatures (308.8 nm). All the measurements were carried out in chloroform.

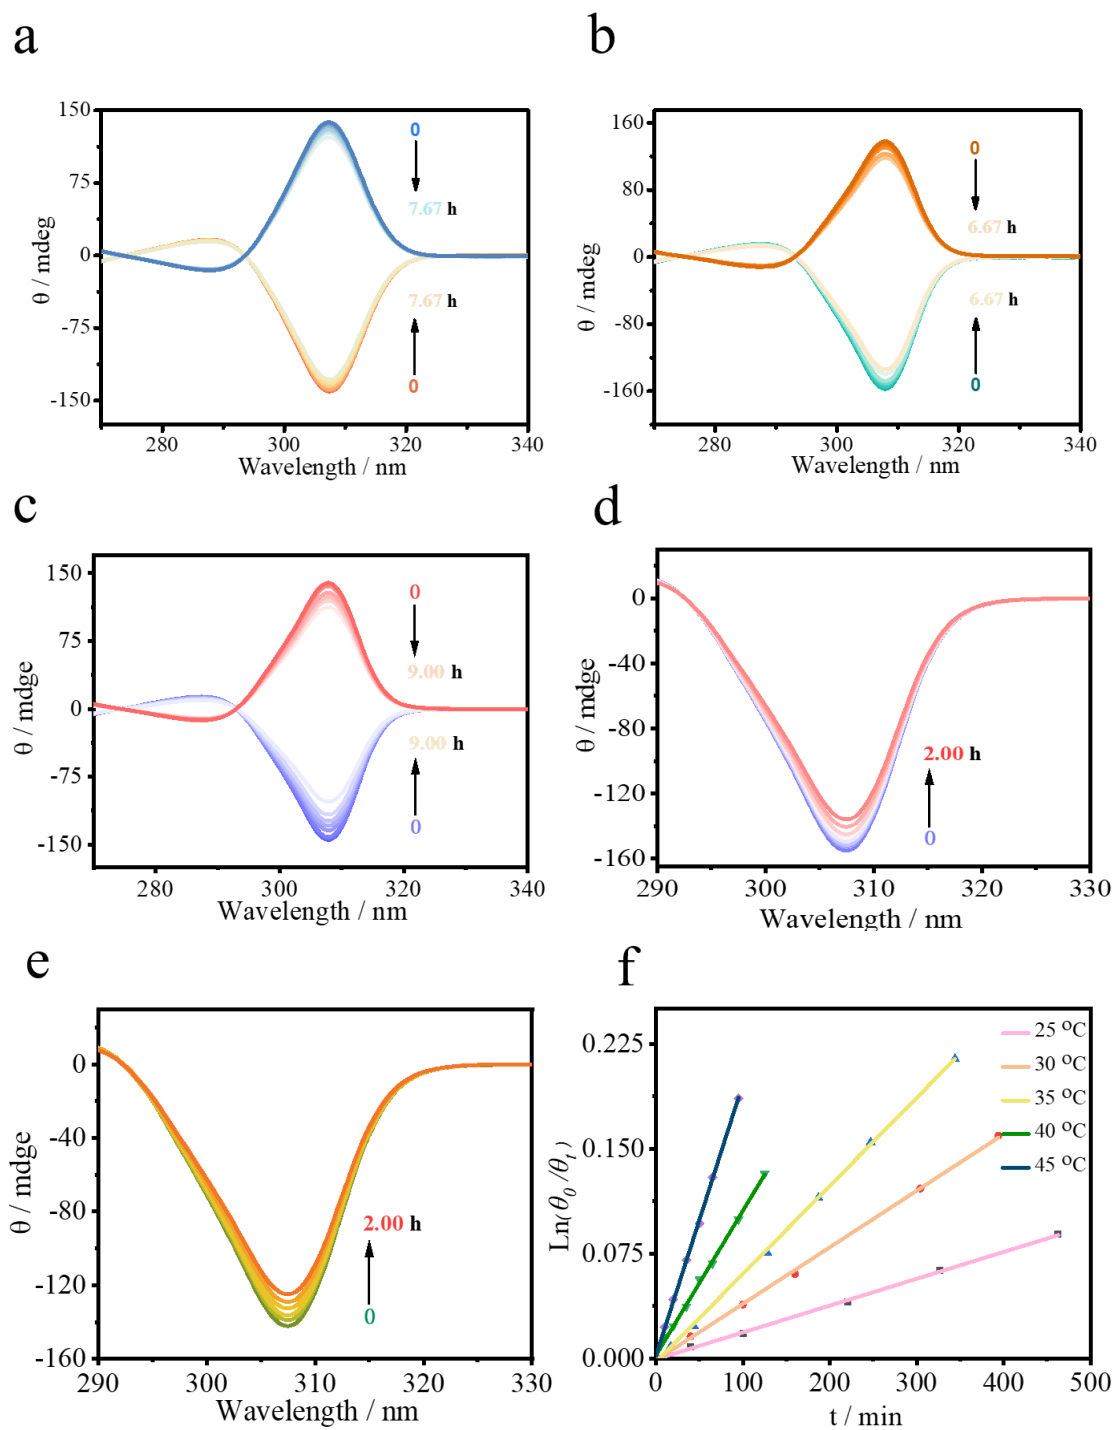

Figure S20. Time-dependent CD spectral changes of **P4** in chloroform ( $[\mathbf{P4}] = 0.05 \text{ mM}$ ) (a) at 25 °C, (b) at 30 °C, (c) at 35 °C, (d) at 40 °C, (e) at 45 °C. (f) Kinetic fittings of **P4**<sub>s</sub> at various temperatures (307.5 nm). All the measurements were carried out in chloroform.

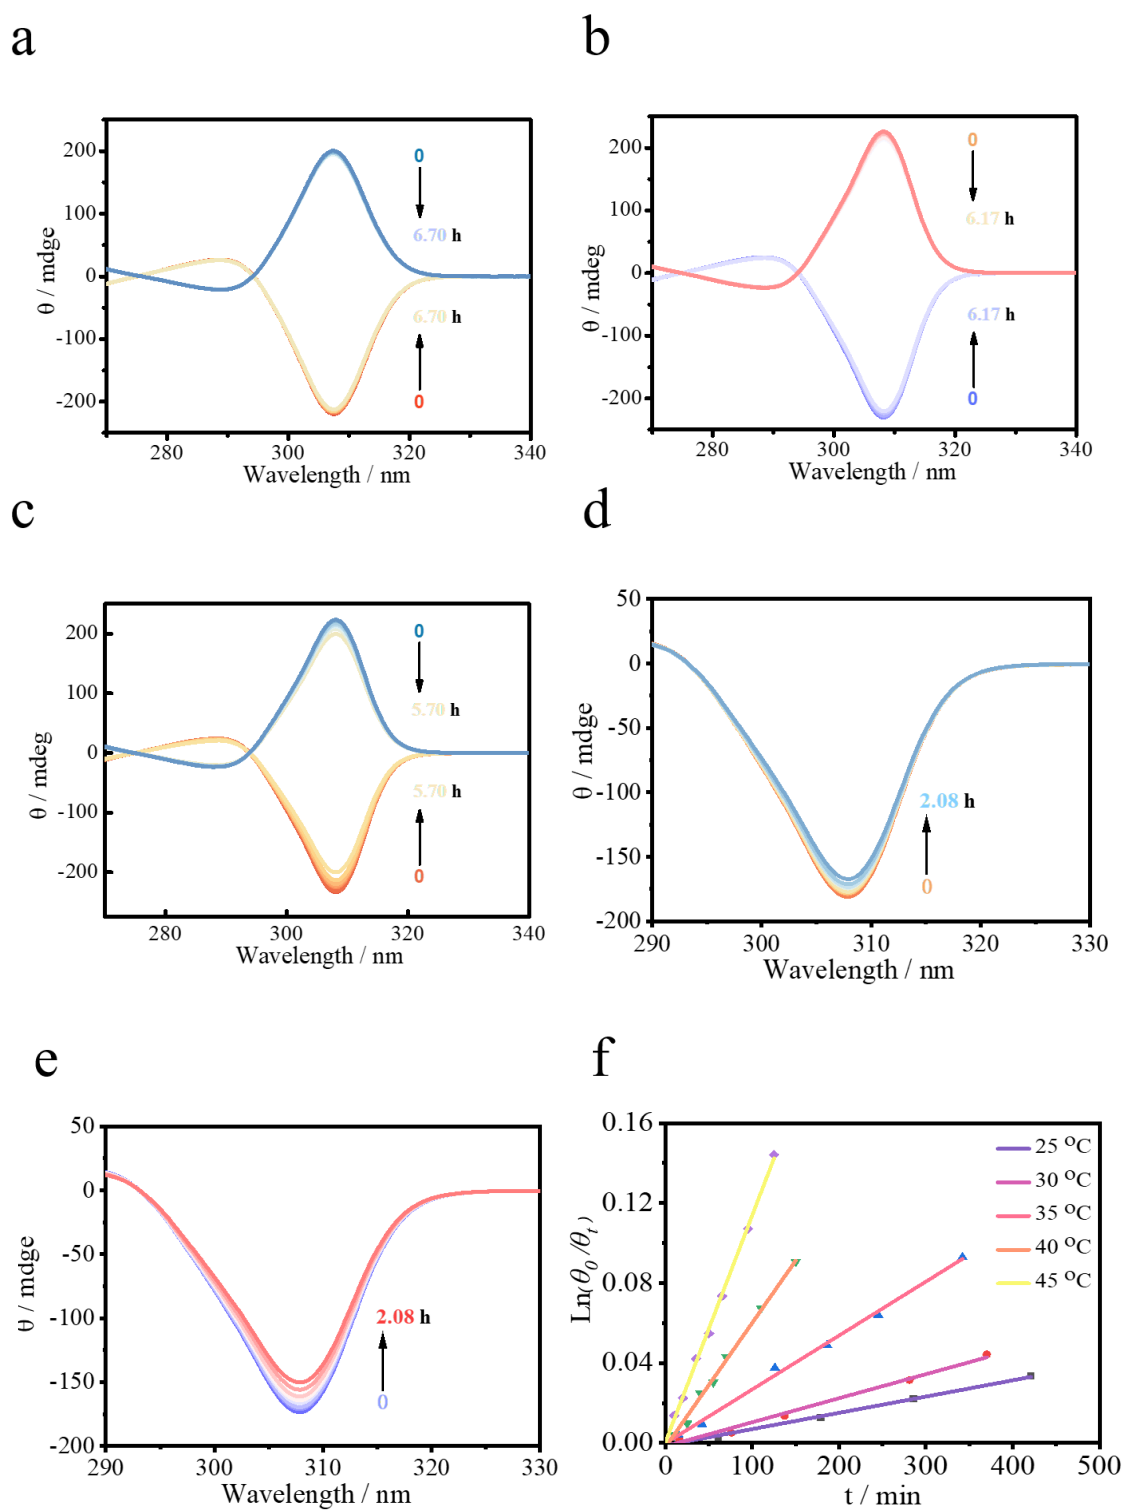

Figure S21. Time-dependent CD spectral changes of **P5** in chloroform ( $[\mathbf{P5}] = 0.05 \text{ mM}$ ) a) at 25 °C, (b) at 30 °C, (c) at 35 °C, (d) at 40 °C, (e) at 45 °C. (f) Kinetic fittings of **P5**<sub>S</sub> at various temperatures (308.8 nm). All the measurements were carried out in chloroform.



a

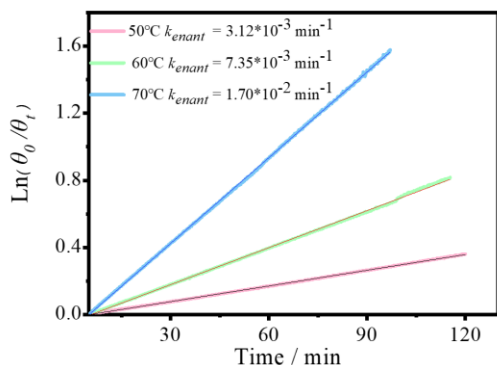

b

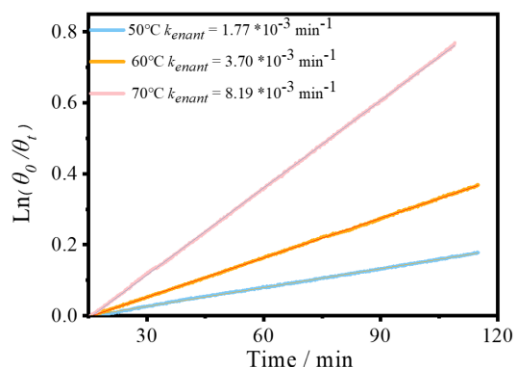

Figure S22. Kinetic fittings of  $P5s$  at various temperatures (308.8 nm) in 1,4-dioxane (a) and toluene (b) at different temperatures.

Table S1. The kinetic parameters of  $P3s$ - $P5s$  in chloroform at different temperatures.

|       | $k_{enant} \cdot \text{min}^{-1a}$ |                       |                       | $t_{1/2} \cdot \text{h}^b$ |       |        |
|-------|------------------------------------|-----------------------|-----------------------|----------------------------|-------|--------|
|       | P3                                 | P4                    | P5                    | P3                         | P4    | P5     |
| 25 °C | $1.44 \times 10^{-2}$              | $9.60 \times 10^{-5}$ | $4.06 \times 10^{-5}$ | 0.40                       | 60.23 | 142.30 |
| 30 °C | $2.20 \times 10^{-2}$              | $2.02 \times 10^{-4}$ | $6.01 \times 10^{-5}$ | 0.26                       | 28.60 | 96.27  |
| 35 °C | $3.28 \times 10^{-2}$              | $3.15 \times 10^{-4}$ | $1.35 \times 10^{-4}$ | 0.18                       | 18.05 | 42.79  |
| 40 °C | /                                  | $5.15 \times 10^{-4}$ | $3.11 \times 10^{-4}$ | /                          | 11.18 | 18.57  |
| 45 °C | /                                  | $9.70 \times 10^{-4}$ | $5.70 \times 10^{-4}$ | /                          | 5.92  | 10.17  |

<sup>a</sup>  $\ln(\theta_0/\theta_t) = 2k_{enant}t$ . <sup>b</sup>  $t_{1/2} = \ln 2/(2k_{enant})$

Table S2. Thermodynamic data of racemic reaction of  $P3s$ - $P5s$  series derivative

|           | $\Delta G^\ddagger / \text{kJ} \cdot \text{mol}^{-1}$ | $\Delta H^\ddagger / \text{kJ} \cdot \text{mol}^{-1}$ | $\Delta S^\ddagger / \text{J} \cdot \text{mol}^{-1}$ | $\Delta E_a / \text{kJ} \cdot \text{mol}^{-1b}$ |
|-----------|-------------------------------------------------------|-------------------------------------------------------|------------------------------------------------------|-------------------------------------------------|
| <b>P1</b> | 62.40 <sup>c</sup>                                    | /                                                     | /                                                    | /                                               |
| <b>P2</b> | 65.04 <sup>d</sup>                                    | /                                                     | /                                                    | /                                               |
| <b>P3</b> | 93.68 <sup>a</sup>                                    | 60.61                                                 | -110.94                                              | 63.11                                           |
| <b>P4</b> | 95.82 <sup>a</sup>                                    | 85.46                                                 | -34.75                                               | 88.02                                           |
| <b>P5</b> | 98.23 <sup>a</sup>                                    | 103.36                                                | 17.13                                                | 109.02                                          |

<sup>a</sup>  $\Delta G^\ddagger = \Delta H^\ddagger - \Delta S^\ddagger T$ .  $\ln(k/T) = \Delta S^\ddagger/R - \ln(h/k_b) - \Delta H^\ddagger/(RT)$ . @at 298.15k

<sup>b</sup>  $\ln k = \ln A - \Delta E/RT$

<sup>c</sup> Data from previously reported literature<sup>1</sup>

<sup>d</sup> Data from the coalescence temperature (T) of NMR signals see Figure S17.

Table S3. The kinetic parameters **P5<sub>S</sub>** at different temperatures in 1,4-dioxane and toluene.

| Solvent                            | 1,4-dioxane |                       |                       | toluene               |                       |                       |                       |
|------------------------------------|-------------|-----------------------|-----------------------|-----------------------|-----------------------|-----------------------|-----------------------|
|                                    | T / °C      | 50 °C                 | 60 °C                 | 70 °C                 | 50 °C                 | 60 °C                 | 70 °C                 |
| $k_{enant} \cdot \text{min}^{-1a}$ |             | $1.56 \times 10^{-3}$ | $3.68 \times 10^{-3}$ | $8.51 \times 10^{-3}$ | $8.85 \times 10^{-4}$ | $1.85 \times 10^{-3}$ | $4.10 \times 10^{-3}$ |
| $t_{1/2} \cdot \text{h}^b$         |             | 3.70                  | 1.57                  | 0.68                  | 6.53                  | 3.12                  | 1.41                  |

<sup>a</sup>  $\text{Ln}(\theta_0 / \theta_t) = 2k_{enant} \cdot t_{1/2} = \ln 2 / (2k_{enant})$ .

Table S4. Thermodynamic data of racemic reaction of **P5<sub>S</sub>** in toluene and 1,4-dioxane

| <b>P5<sub>S</sub></b> | $\Delta G^\ddagger / \text{kJ} \cdot \text{mol}^{-1a}$ | $\Delta H^\ddagger / \text{kJ} \cdot \text{mol}^{-1}$ | $\Delta S^\ddagger / \text{J} \cdot \text{mol}^{-1}$ | $\Delta E_a / \text{kJ} \cdot \text{mol}^{-1b}$ |
|-----------------------|--------------------------------------------------------|-------------------------------------------------------|------------------------------------------------------|-------------------------------------------------|
| <b>Toluene</b>        | 113.700                                                | 67.80                                                 | -128.391                                             | 70.57                                           |
| <b>1,4-dioxane</b>    | 97.620                                                 | 75.42                                                 | -100.017                                             | 80.40                                           |

<sup>a</sup>  $\Delta G^\ddagger = \Delta H^\ddagger - \Delta S^\ddagger T$ .  $\ln(k/T) = \Delta S^\ddagger/R - \ln(h/k_b) - \Delta H^\ddagger/(RT)$ . @at 298.15k

<sup>b</sup>  $\text{Ln}k = \text{Ln}A - \Delta E/RT$

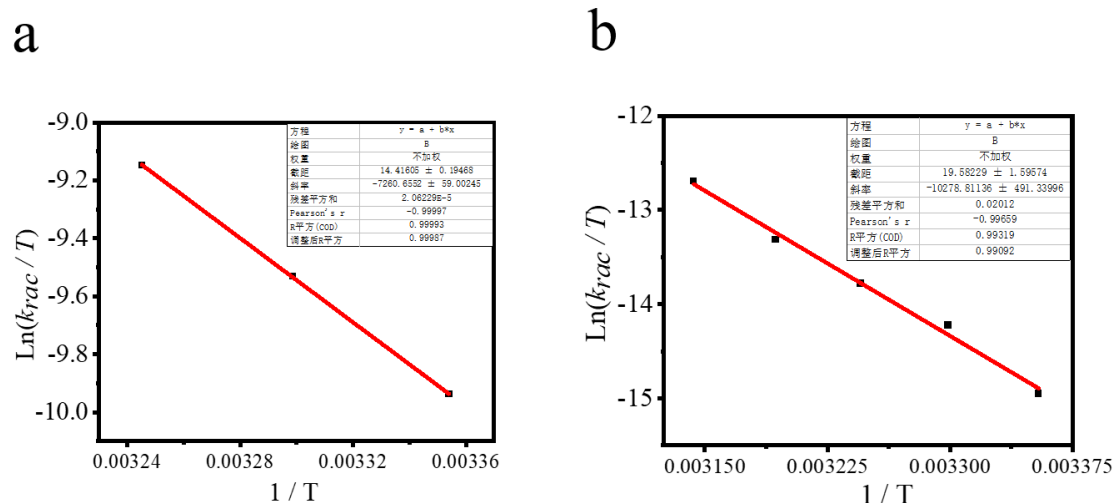

Figure S23. Eyring plots for the racemization of **P3s** (a), **P4s** (b) in  $\text{CHCl}_3$ .

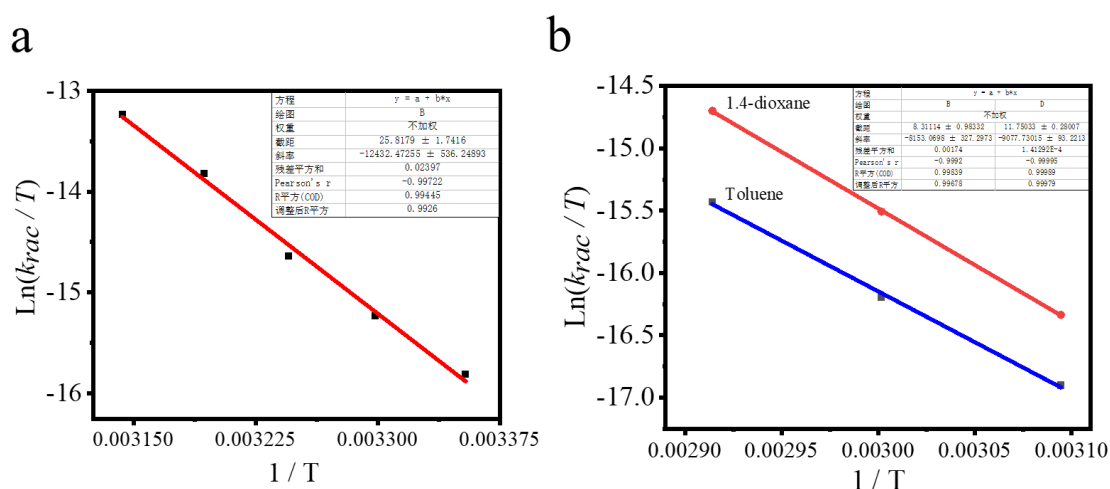

Figure S24. Eyring plots for the racemization of **P5s** in chloroform (a) and other solvents (b).

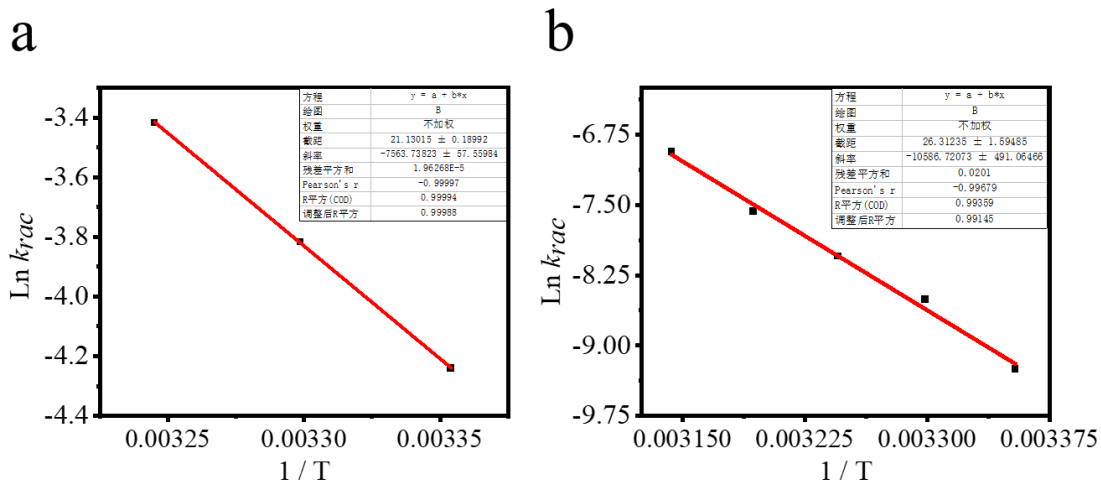

Figure S25. Arrhenius plots for the racemization of **P3s** (a) and **P4s** (b) in chloroform.

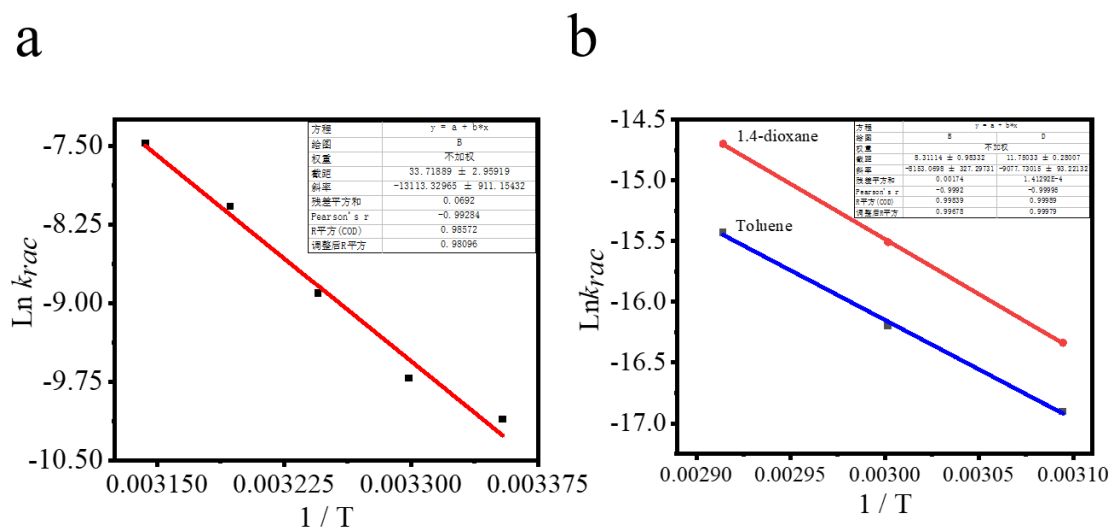

Figure S26. Arrhenius plots for the racemization of **P5s** in chloroform (a) and other solvents (b).

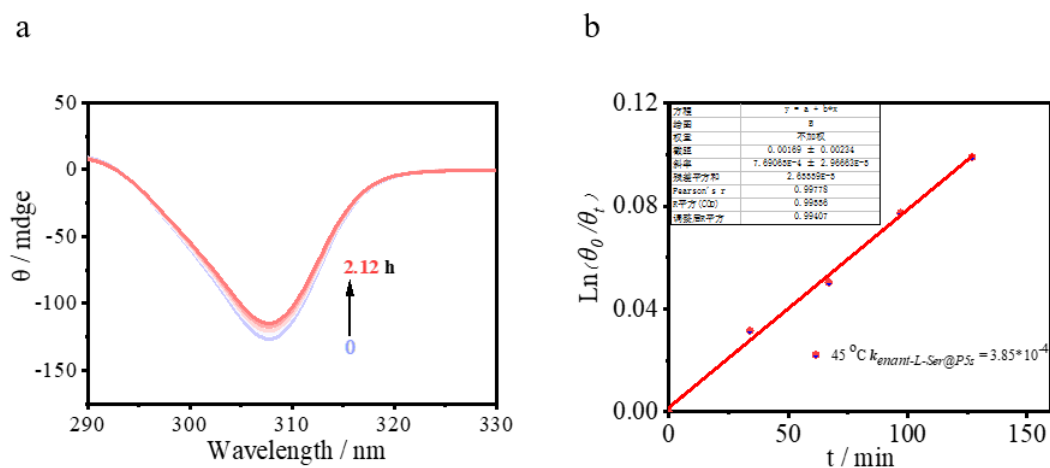

Figure S27. (a) Time-dependent CD spectral changes of **L-Ser@P5s** in chloroform ( $[L-Ser] = [P5s] = 0.05 \text{ mM}$ ) at  $45 \text{ }^\circ\text{C}$ . (b) Kinetic fittings of **P5s** at  $45 \text{ }^\circ\text{C}$  ( $308.8 \text{ nm}$ ) and the  $k_{enant-L-Ser@P5s} = 3.85 \cdot 10^{-4}$  with  $t_{1/2} = 15.0 \text{ h}$ .

## 5 The Chiral recognition of P5

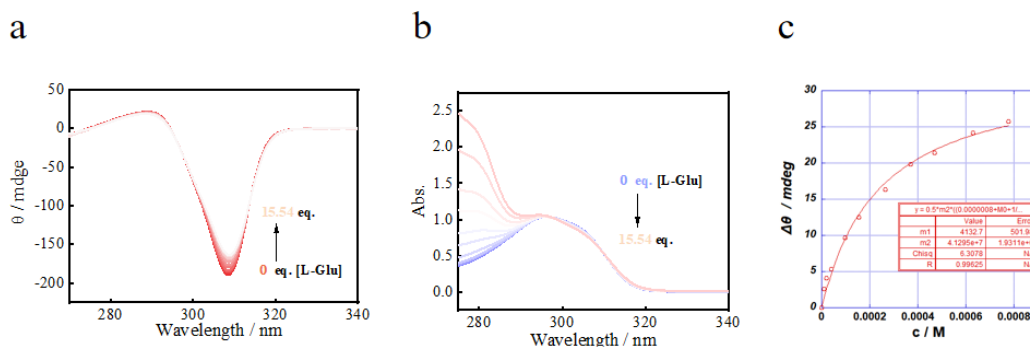

Figure S28. (a). The non-linear curve-fitting (CD titrations) for the complexation of *L*-Glu and P5<sub>s</sub> (308.6 nm) (b). Abs spectral changes of P5<sub>s</sub> (0.05 M) upon titration with *L*-Glu (c). Curve fitting based on the CD intensity changes. The host-guest association constant ( $K_{L-Glu@P5s}$ ) was estimated to be  $4.13 \times 10^3 \text{ M}^{-1}$ . All the measurements were carried out in chloroform at 25 °C.

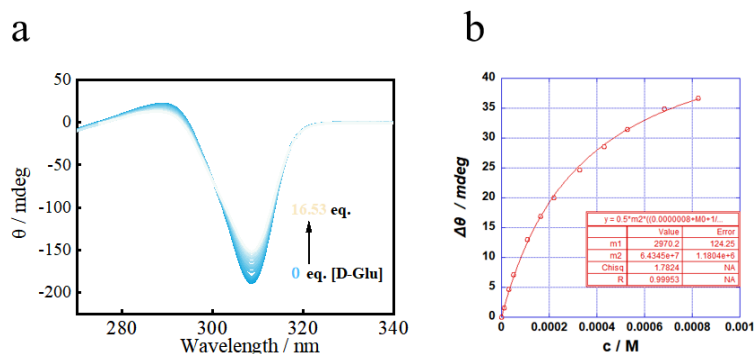

Figure S29. (a). The non-linear curve-fitting (CD titrations) for the complexation of *D*-Glu and P5<sub>s</sub> (308.6 nm) (b). Curve fitting based on the CD intensity changes. The association constant ( $K_{D-Glu@P5s}$ ) was estimated at  $2.97 \times 10^3 \text{ M}^{-1}$ . All the measurements were carried out in chloroform at 25 °C.

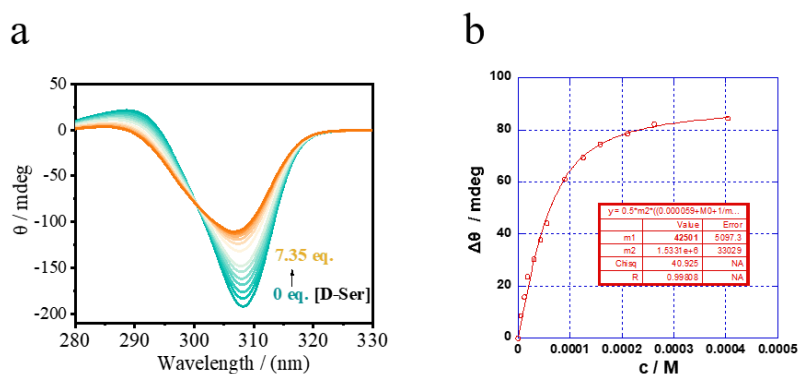

Figure S30. (a). The non-linear curve-fitting (CD titrations) for the complexation of *D*-Ser and P5<sub>s</sub> (308.6 nm) (b). Curve fitting based on the CD intensity changes. The association constant ( $K_{D-Ser@P5s}$ ) was estimated to be  $4.25 \times 10^4 \text{ M}^{-1}$ . All the measurements were carried out in chloroform at 25 °C.

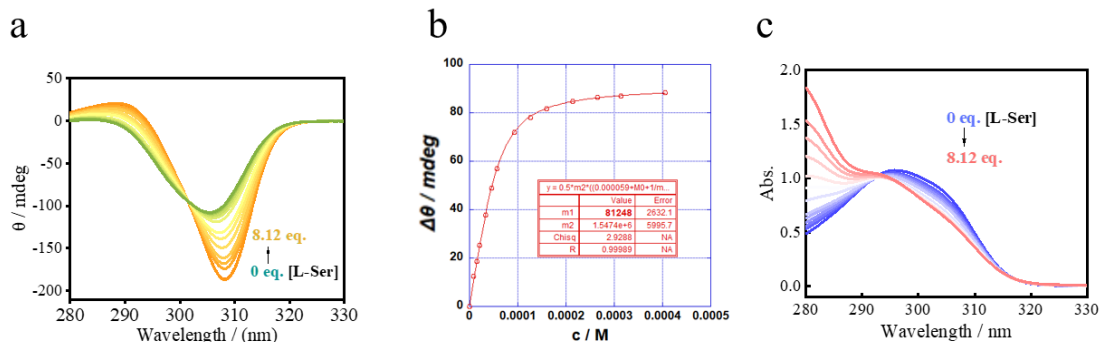

Figure S31. (a). The non-linear curve-fitting (CD titrations) for the complexation of *L*-Ser and **P5<sub>S</sub>** (308.6 nm) (b). Curve fitting based on the CD intensity changes. The association constant ( $K_{L-Ser@P5s}$ ) was estimated to be  $8.12 \times 10^4 M^{-1}$  (c). UV-vis spectral changes of **P5<sub>S</sub>** (0.05 M) upon titration with *L*-Ser. All the measurements were carried out in chloroform at 25 °C.

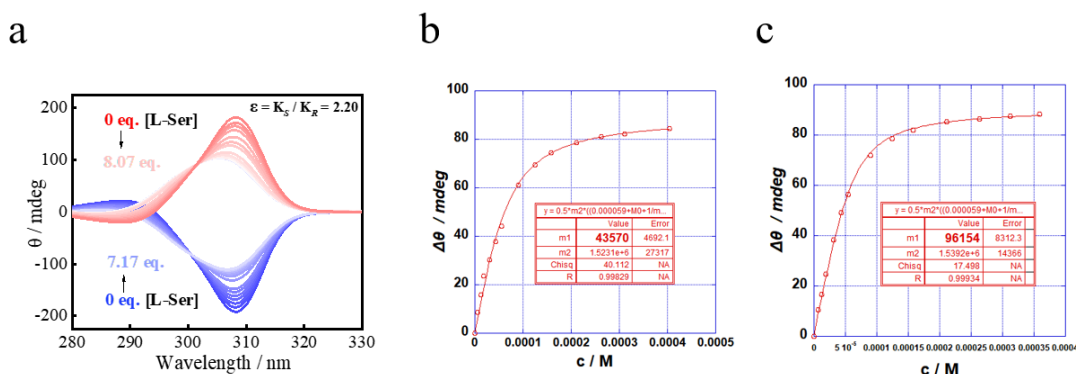

Figure S32. (a). The non-linear curve-fitting (CD titrations) for the complexation of *L*-Ser and **P5<sub>RS</sub>** (308.6 nm) (b) and (c). Curve fitting based on the CD intensity changes. The association constants ( $K_{L-Ser@P5s}$  and  $K_{L-Ser@P5R}$ ) were estimated to be  $9.62 \times 10^4 M^{-1}$  and  $4.36 \times 10^4 M^{-1}$ . All the measurements were carried out in chloroform at 25 °C.

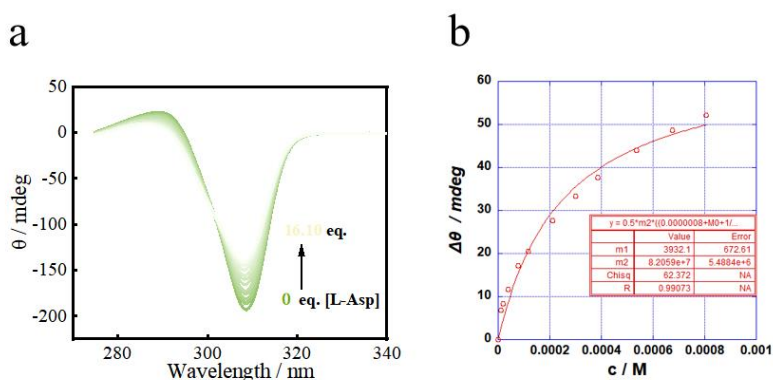

Figure S33. (a). The non-linear curve-fitting (CD titrations) for the complexation of *L*-Asp and **P5<sub>S</sub>** (308.6 nm) (b). Curve fitting based on the CD intensity changes. The association constant ( $K_{L-Asp@P5s}$ ) was estimated to be  $3.93 \times 10^3 M^{-1}$ . All the measurements were carried out in chloroform at 25 °C.

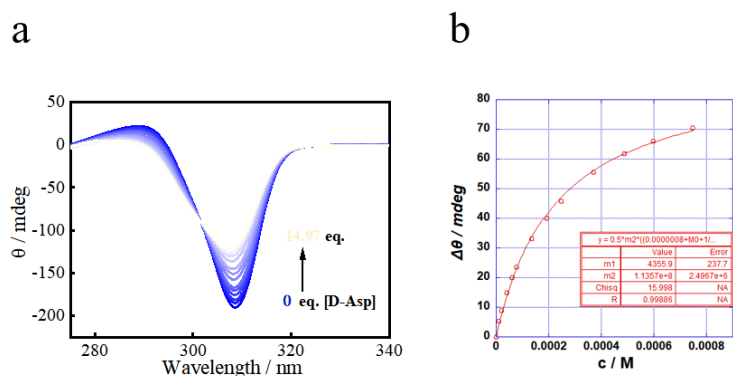

Figure S34. (a). The non-linear curve-fitting (CD titrations) for the complexation of *D*-Asp and **P5<sub>S</sub>** (308.6 nm) (b). Curve fitting based on the CD intensity changes. The host-guest association constant ( $K_{D-Asp@P5_S}$ ) was estimated to be  $4.36 \times 10^3 \text{ M}^{-1}$ . All the measurements were carried out in chloroform at 25 °C.

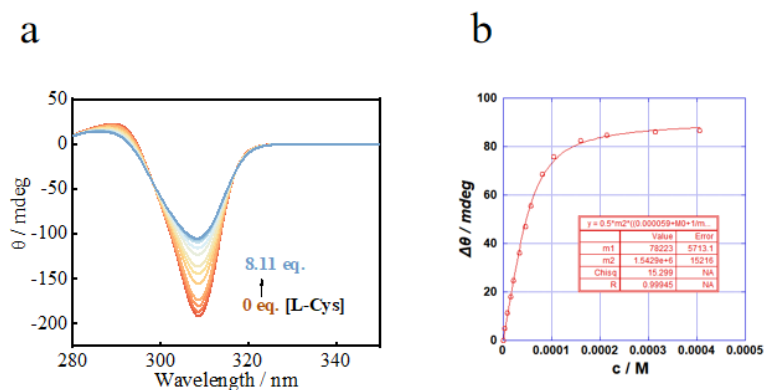

Figure S35. (a). The non-linear curve-fitting (CD titrations) for the complexation of *L*-Cys and **P5<sub>S</sub>** (308.6 nm) (b). Curve fitting based on the CD intensity changes. The host-guest association constant ( $K_{L-Cys@P5_S}$ ) was estimated to be  $7.82 \times 10^4 \text{ M}^{-1}$ . All the measurements were carried out in chloroform at 25 °C.

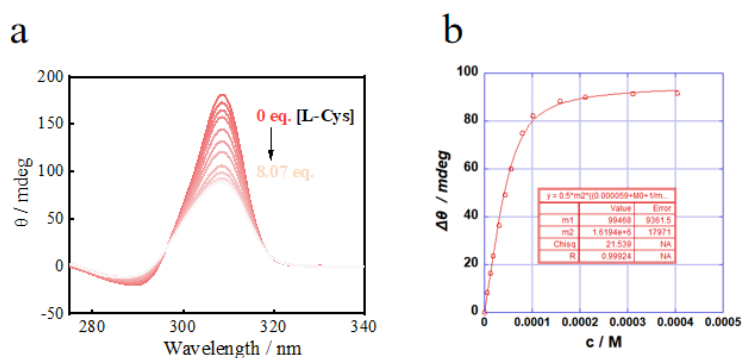

Figure S36. (a). The non-linear curve-fitting (CD titrations) for the complexation of *L*-Cys and **P5<sub>R</sub>** (308.6 nm) (b). Curve fitting based on the CD intensity changes. The host-guest association constant ( $K_{L-Cys@P5_R}$ ) was estimated to be  $9.95 \times 10^4 \text{ M}^{-1}$ . All the measurements were carried out in chloroform at 25 °C.

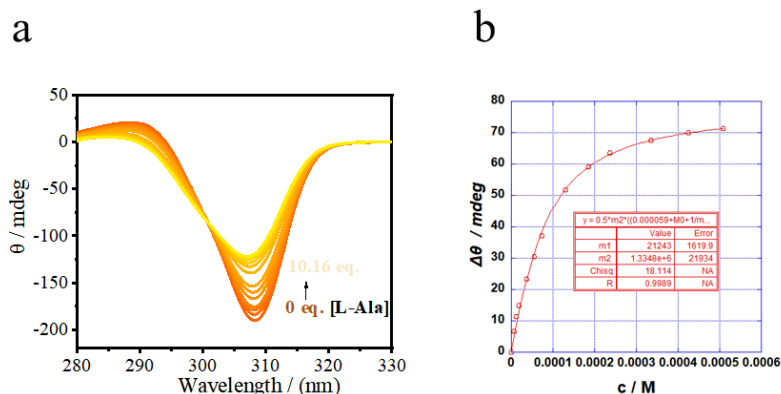

Figure S37. (a). The non-linear curve-fitting (CD titrations) for the complexation of *L*-Ala and **P5<sub>S</sub>** (308.6 nm) (b). Curve fitting based on the CD intensity changes. The host-guest association constant ( $K_{L-Ala@P5s}$ ) was estimated to be  $2.12 \times 10^4 \text{ M}^{-1}$ . All the measurements were carried out in chloroform at 25 °C.

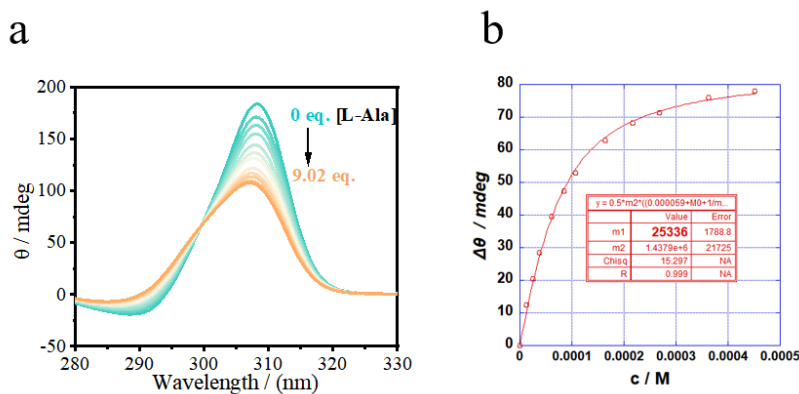

Figure S38. (a). The non-linear curve-fitting (CD titrations) for the complexation of *L*-Ala and **P5<sub>R</sub>** (308.6 nm) (b). Curve fitting based on the CD intensity changes. The host-guest association constant ( $K_{L-Ala@P5R}$ ) was estimated to be  $2.53 \times 10^4 \text{ M}^{-1}$ . All the measurements were carried out in chloroform at 25 °C.

Table S5. The association constants of **P5<sub>R/S</sub>** with different chiral amino acids and enantioselective recognition.

|                     | $K_{L@P5R}$        | $K_{L@P5S}$        | $\epsilon$ |
|---------------------|--------------------|--------------------|------------|
| <b><i>L</i>-Ala</b> | $2.53 \times 10^4$ | $2.21 \times 10^4$ | 1.14       |
| <b><i>L</i>-Cys</b> | $9.95 \times 10^4$ | $7.82 \times 10^4$ | 1.27       |
| <b><i>L</i>-Ser</b> | $4.36 \times 10^4$ | $9.62 \times 10^4$ | 2.20       |

$$\epsilon = K_{L@P5s} / K_{L@P5R} \text{ OR } K_{L@P5R} / K_{L@P5s}$$

Table S6. The association constants of **P5<sub>S</sub>** with different chiral amino acids and enantioselective recognition  $\epsilon$ .

|            | $K_{L@P5s}$        | $K_{D@P5s}$        | $\epsilon$ |
|------------|--------------------|--------------------|------------|
| <b>Glu</b> | $4.13 \times 10^3$ | $2.97 \times 10^3$ | 1.39       |
| <b>Asp</b> | $3.93 \times 10^3$ | $4.36 \times 10^3$ | 1.11       |
| <b>Ser</b> | $8.12 \times 10^4$ | $4.25 \times 10^4$ | 1.92       |

$$\epsilon = K_{L@P5s} / K_{D@P5s} \text{ OR } K_{D@P5s} / K_{L@P5s}$$

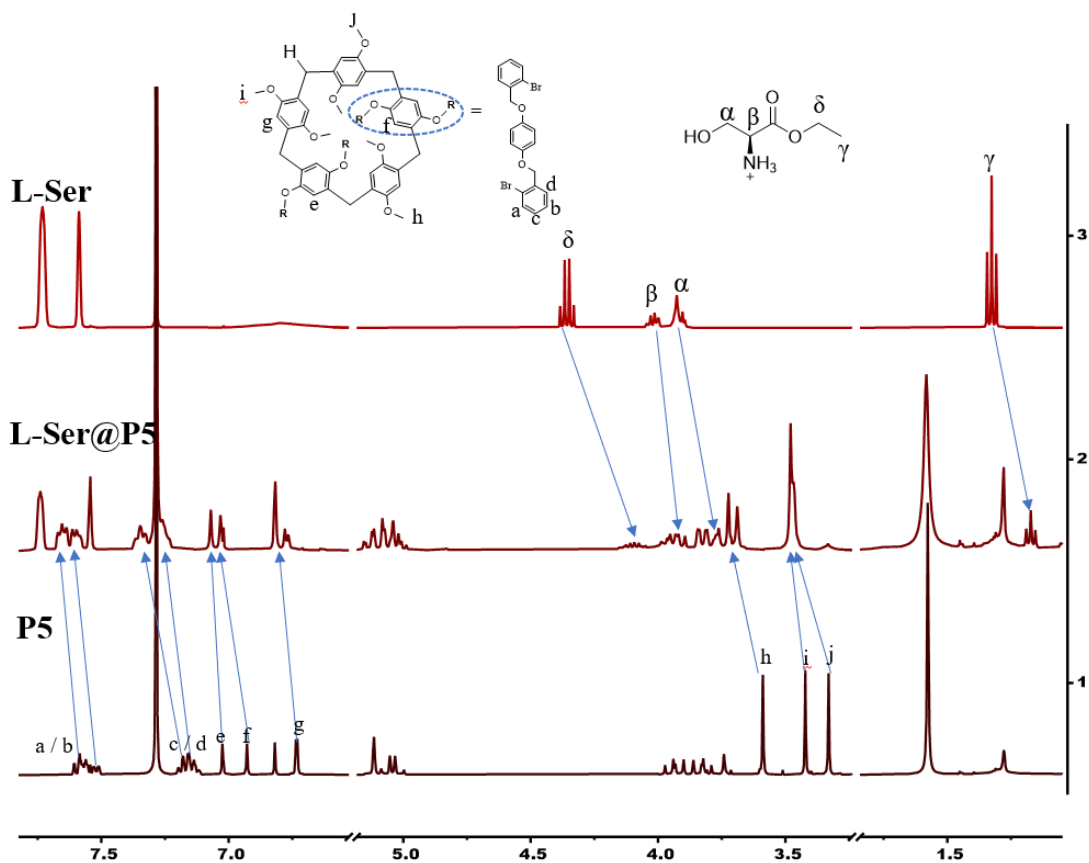

Figure S39. The  $^1\text{H}$  NMR spectra of *L*-Ser, **P5** and **P5@L-Ser** (H/G = 1:1) in chloroform-*d*.

## 6 The X-ray single crystal analyses of P1-P5

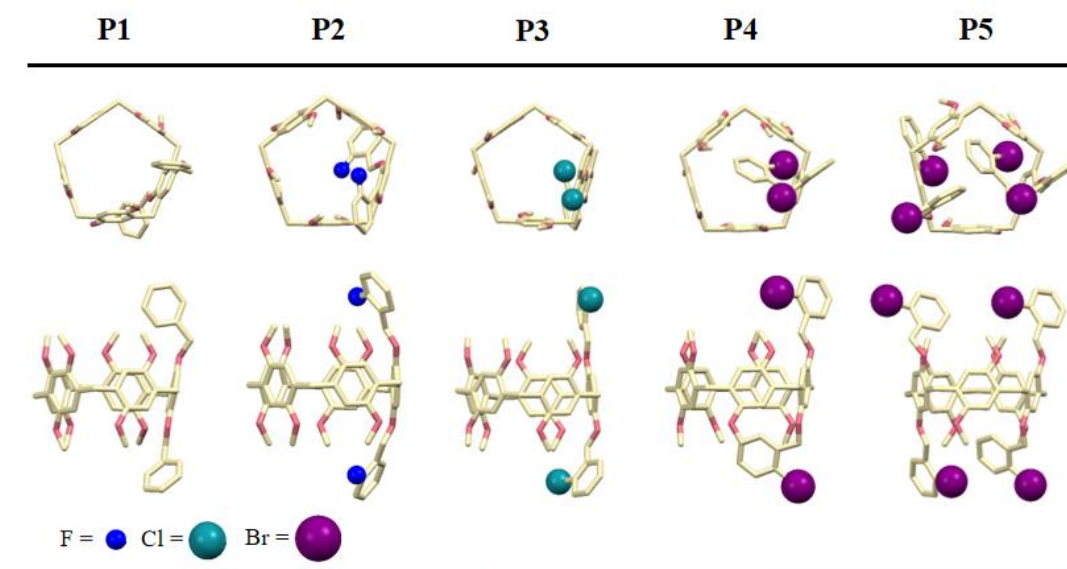

Figure S40. The top and front view of the X-ray structure of **P1-P5** from left to right.



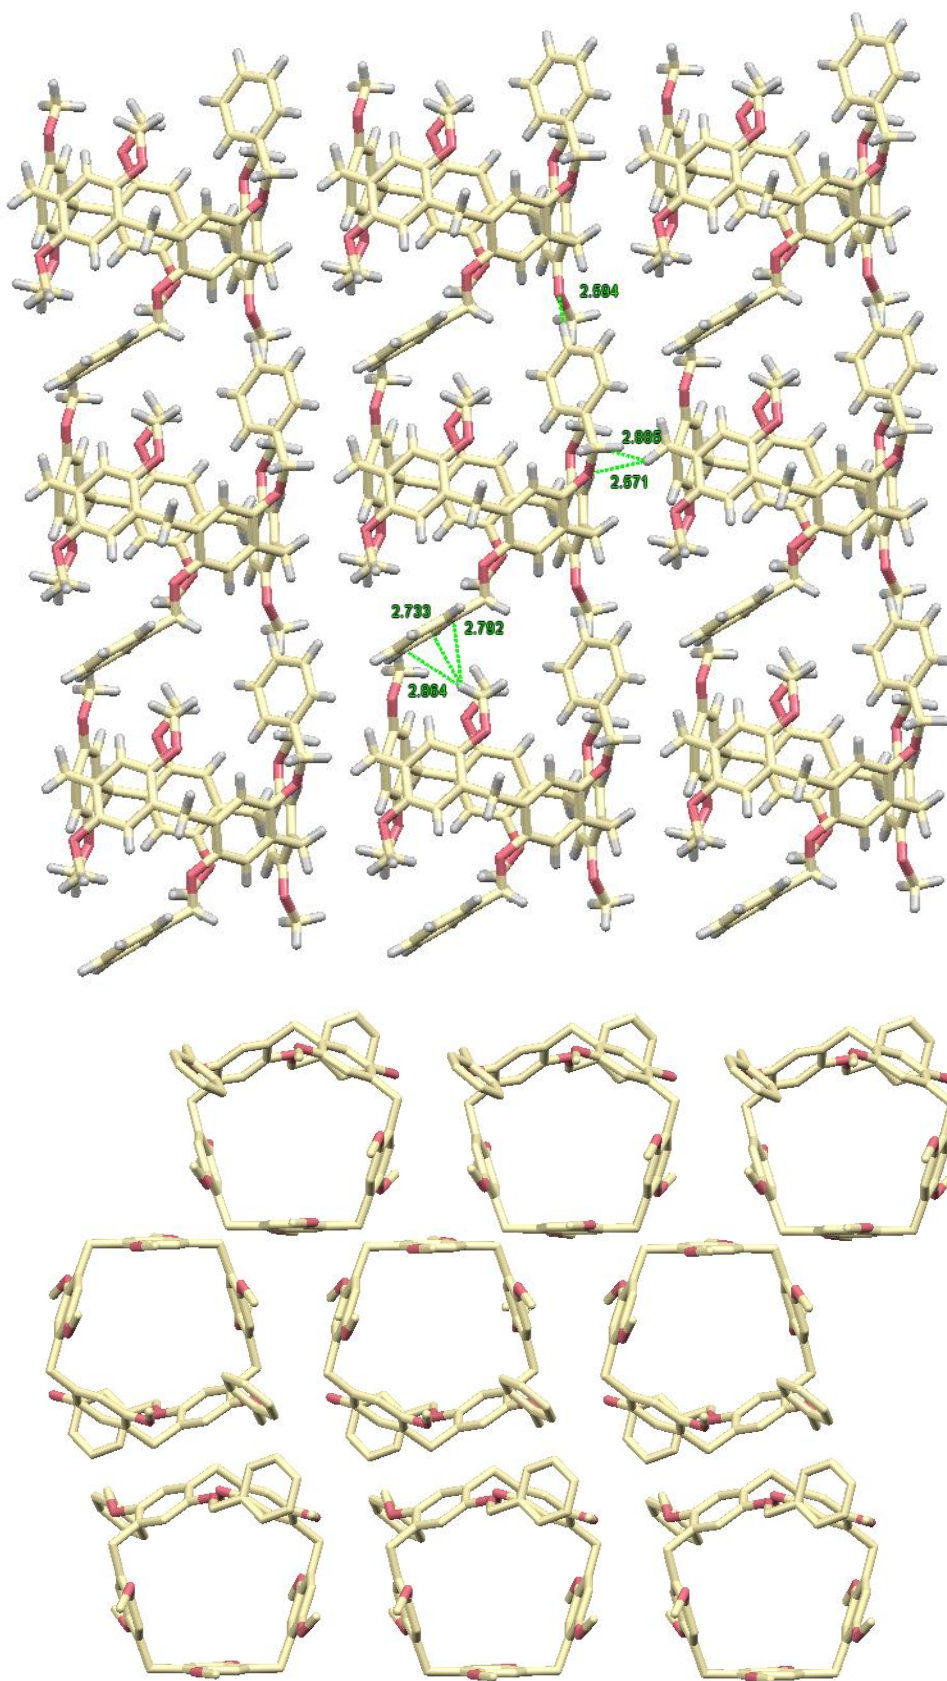

Figure S41. The front view (top) and top view (bottom) of the X-ray structure of **P1**

|                                            |                                                                |
|--------------------------------------------|----------------------------------------------------------------|
| CCDC                                       | 2323526                                                        |
| Empirical formula                          | C <sub>57</sub> H <sub>58</sub> O <sub>10</sub>                |
| Formula weight                             | 903.03                                                         |
| Temperature/K                              | 200.0                                                          |
| Crystal system                             | monoclinic                                                     |
| Space group                                | P2 <sub>1</sub> /n                                             |
| a/Å                                        | 12.1526(6)                                                     |
| b/Å                                        | 11.4788(6)                                                     |
| c/Å                                        | 39.259(2)                                                      |
| α/°                                        | 90                                                             |
| β/°                                        | 98.258(2)                                                      |
| γ/°                                        | 90                                                             |
| Volume/Å <sup>3</sup>                      | 5419.7(5)                                                      |
| Z                                          | 4                                                              |
| ρ <sub>calc</sub> /cm <sup>3</sup>         | 1.107                                                          |
| μ/mm <sup>-1</sup>                         | 0.075                                                          |
| F(000)                                     | 1920.0                                                         |
| Crystal size/mm <sup>3</sup>               | 0.5 × 0.3 × 0.1                                                |
| Radiation                                  | MoKα (λ = 0.710)                                               |
| 2θ range for data collection/°             | 4.118 to 55.128                                                |
| Index ranges                               | -15 ≤ h ≤ 15, -14 ≤ k ≤ 14, -42 ≤ l ≤ 51                       |
| Reflections collected                      | 37646                                                          |
| Independent reflections                    | 12291 [R <sub>int</sub> = 0.0597, R <sub>sigma</sub> = 0.0727] |
| Data/restraints/parameters                 | 12291/24/634                                                   |
| Goodness-of-fit on F <sup>2</sup>          | 1.045                                                          |
| Final R indexes [I >= 2σ (I)]              | R <sub>1</sub> = 0.0813, wR <sub>2</sub> = 0.1993              |
| Final R indexes [all data]                 | R <sub>1</sub> = 0.1192, wR <sub>2</sub> = 0.2192              |
| Largest diff. peak/hole / e Å <sup>3</sup> | 0.26/-0.23                                                     |

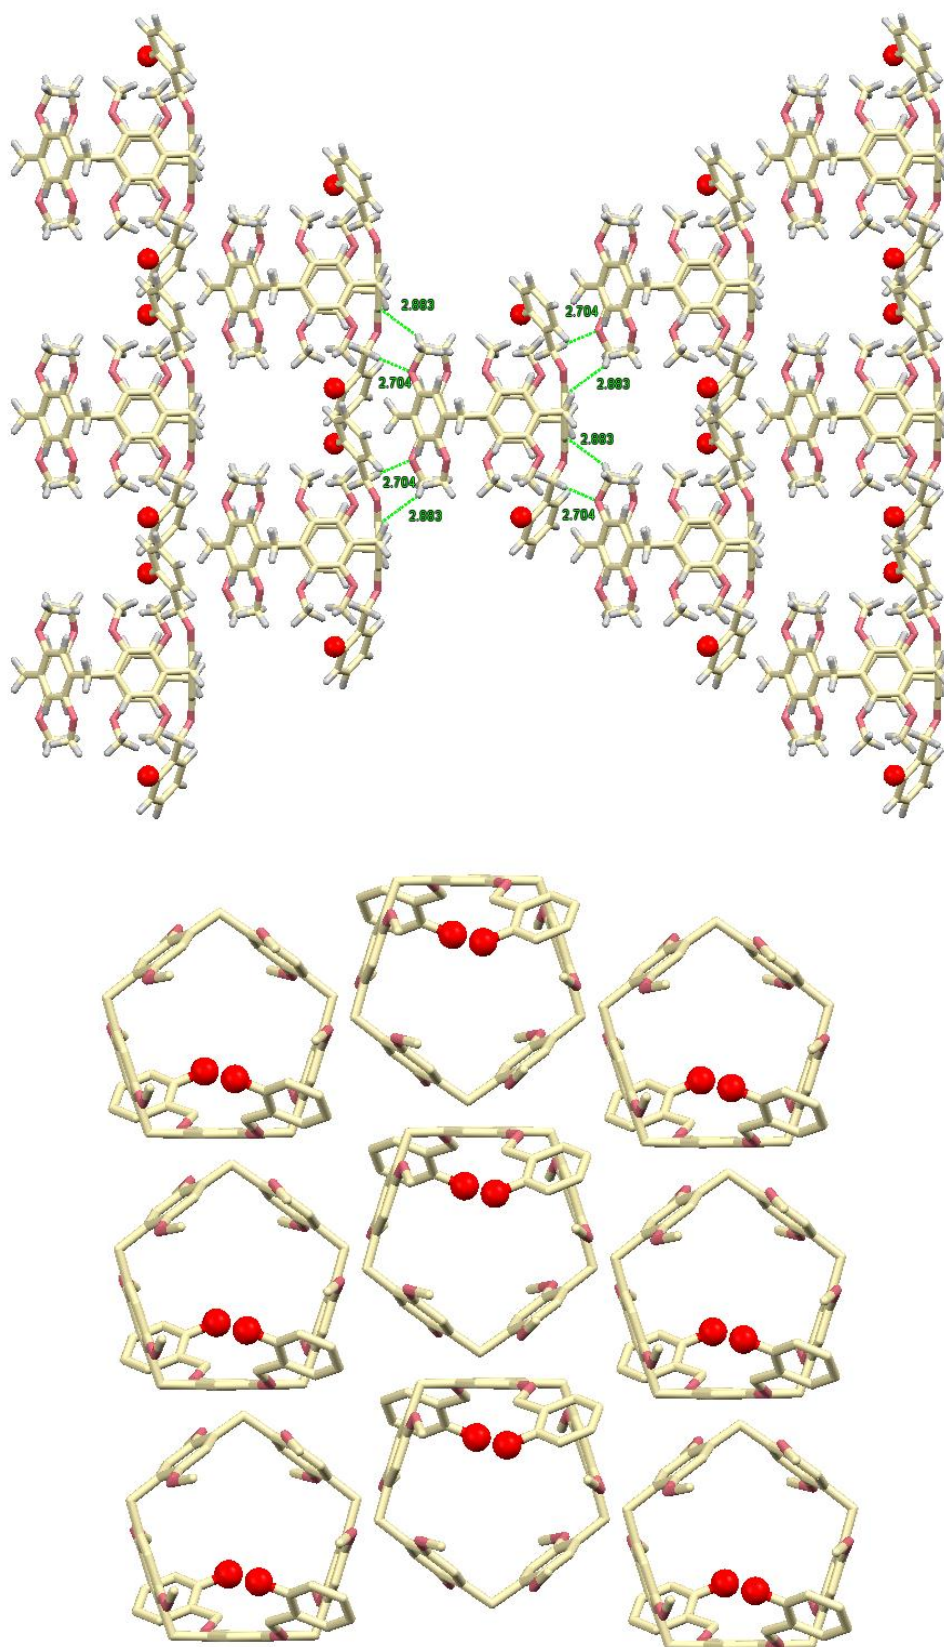

Figure S42. The front view (top) and top view (bottom) of the X-ray structure of **P2**

|                                             |                                                                |
|---------------------------------------------|----------------------------------------------------------------|
| CCDC                                        | 2323535                                                        |
| Empirical formula                           | C <sub>57</sub> H <sub>54</sub> F <sub>2</sub> O <sub>10</sub> |
| Formula weight                              | 937.00                                                         |
| Temperature/K                               | 200.0                                                          |
| Crystal system                              | monoclinic                                                     |
| Space group                                 | C2/c                                                           |
| a/Å                                         | 14.0735(17)                                                    |
| b/Å                                         | 20.2388(17)                                                    |
| c/Å                                         | 19.436(2)                                                      |
| α/°                                         | 90                                                             |
| β/°                                         | 91.622(5)                                                      |
| γ/°                                         | 90                                                             |
| Volume/Å <sup>3</sup>                       | 5533.9(10)                                                     |
| Z                                           | 4                                                              |
| ρ <sub>calc</sub> /g/cm <sup>3</sup>        | 1.125                                                          |
| μ/mm <sup>-1</sup>                          | 0.081                                                          |
| F(000)                                      | 1976.0                                                         |
| Crystal size/mm <sup>3</sup>                | 0.31 × 0.17 × 0.14                                             |
| Radiation                                   | MoKα (λ = 0.71073)                                             |
| 2θ range for data collection/°              | 4.06 to 49.998                                                 |
| Index ranges                                | -16 ≤ h ≤ 16, -24 ≤ k ≤ 24, -23 ≤ l ≤ 23                       |
| Reflections collected                       | 39022                                                          |
| Independent reflections                     | 4862 [R <sub>int</sub> = 0.0608, R <sub>sigma</sub> = 0.0294]  |
| Data/restraints/parameters                  | 4862/0/317                                                     |
| Goodness-of-fit on F <sup>2</sup>           | 1.043                                                          |
| Final R indexes [I ≥ 2σ (I)]                | R <sub>1</sub> = 0.0491, wR <sub>2</sub> = 0.1324              |
| Final R indexes [all data]                  | R <sub>1</sub> = 0.0673, wR <sub>2</sub> = 0.1497              |
| Largest diff. peak/hole / e Å <sup>-3</sup> | 0.53/-0.20                                                     |



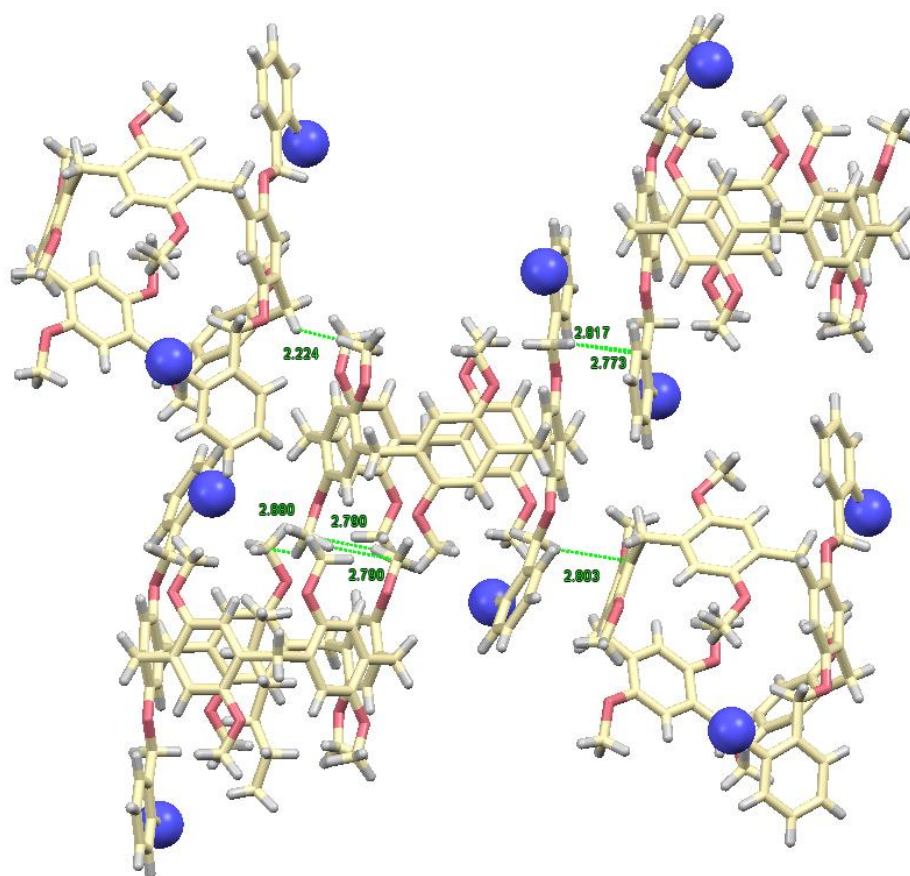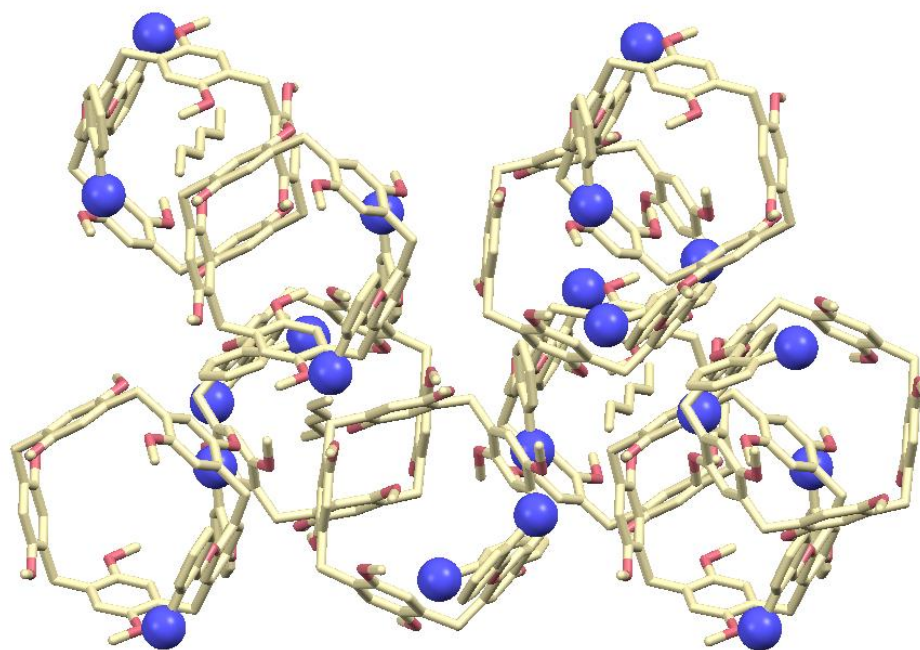

Figure S43. The front view (top) and top view (bottom) of the X-ray structure of **P3**

|                                             |                                                                 |
|---------------------------------------------|-----------------------------------------------------------------|
| CCDC                                        | 2323538                                                         |
| Empirical formula                           | C <sub>63</sub> H <sub>70</sub> Cl <sub>2</sub> O <sub>10</sub> |
| Formula weight                              | 1058.09                                                         |
| Temperature/K                               | 194.0                                                           |
| Crystal system                              | monoclinic                                                      |
| Space group                                 | P21/c                                                           |
| a/Å                                         | 24.0650(16)                                                     |
| b/Å                                         | 12.0314(6)                                                      |
| c/Å                                         | 21.5310(15)                                                     |
| α/°                                         | 90                                                              |
| β/°                                         | 108.464(2)                                                      |
| γ/°                                         | 90                                                              |
| Volume/Å <sup>3</sup>                       | 5913.1(6)                                                       |
| Z                                           | 4                                                               |
| ρ <sub>calc</sub> /cm <sup>3</sup>          | 1.189                                                           |
| μ/mm <sup>-1</sup>                          | 0.166                                                           |
| F(000)                                      | 2248.0                                                          |
| Crystal size/mm <sup>3</sup>                | 0.35 × 0.27 × 0.15                                              |
| Radiation                                   | MoKα (λ = 0.71073)                                              |
| 2θ range for data collection/°              | 3.82 to 55.09                                                   |
| Index ranges                                | -31 ≤ h ≤ 31, -15 ≤ k ≤ 15, -27 ≤ l ≤ 28                        |
| Reflections collected                       | 134969                                                          |
| Independent reflections                     | 13616 [R <sub>int</sub> = 0.0830, R <sub>sigma</sub> = 0.0371]  |
| Data/restraints/parameters                  | 13616/0/686                                                     |
| Goodness-of-fit on F <sup>2</sup>           | 1.020                                                           |
| Final R indexes [I ≥ 2σ (I)]                | R1 = 0.0516, wR2 = 0.1242                                       |
| Final R indexes [all data]                  | R1 = 0.0870, wR2 = 0.1463                                       |
| Largest diff. peak/hole / e Å <sup>-3</sup> | 0.51/-0.42                                                      |

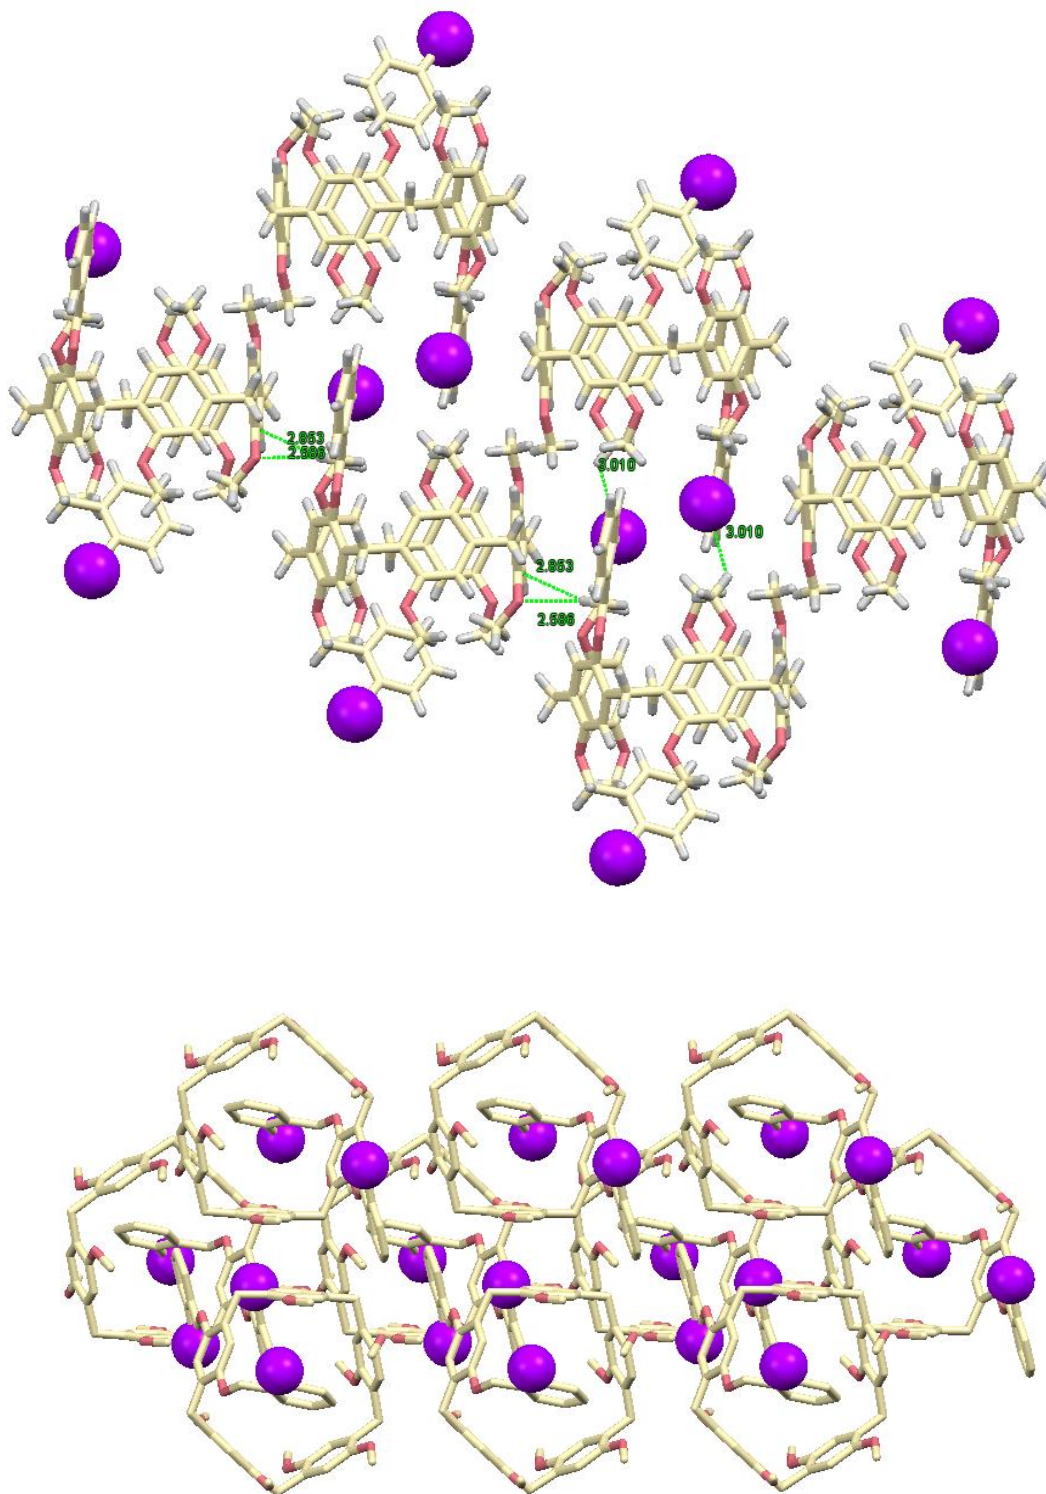

Figure S44. The front view (top) and top view (bottom) of the X-ray structure of **P4**

|                                                |                                                                   |
|------------------------------------------------|-------------------------------------------------------------------|
| CCDC                                           | 2323573                                                           |
| Empirical formula                              | $C_{59}H_{59}Br_2NO_{10}$                                         |
| Formula weight                                 | 1101.89                                                           |
| Temperature/K                                  | 293.15                                                            |
| Crystal system                                 | triclinic                                                         |
| Space group                                    | P-1                                                               |
| a/Å                                            | 11.7611(8)                                                        |
| b/Å                                            | 12.0573(7)                                                        |
| c/Å                                            | 22.3244(15)                                                       |
| $\alpha/^\circ$                                | 83.405(5)                                                         |
| $\beta/^\circ$                                 | 86.013(6)                                                         |
| $\gamma/^\circ$                                | 66.593(6)                                                         |
| Volume/Å <sup>3</sup>                          | 2885.0(3)                                                         |
| Z                                              | 2                                                                 |
| $\rho_{\text{calc}}/\text{g/cm}^3$             | 1.268                                                             |
| $\mu/\text{mm}^{-1}$                           | 1.460                                                             |
| F(000)                                         | 1140.0                                                            |
| Crystal size/mm <sup>3</sup>                   | 0.35 × 0.3 × 0.25                                                 |
| Radiation                                      | MoK $\alpha$ ( $\lambda = 0.71073$ )                              |
| 2 $\Theta$ range for data collection/ $^\circ$ | 6.238 to 52.74                                                    |
| Index ranges                                   | -13 ≤ h ≤ 14, -15 ≤ k ≤ 15, -27 ≤ l ≤ 27                          |
| Reflections collected                          | 24139                                                             |
| Independent reflections                        | 11778 [ $R_{\text{int}} = 0.0382$ , $R_{\text{sigma}} = 0.1050$ ] |
| Data/restraints/parameters                     | 11778/0/658                                                       |
| Goodness-of-fit on F <sup>2</sup>              | 0.999                                                             |
| Final R indexes [ $I \geq 2\sigma(I)$ ]        | $R_1 = 0.0696$ , $wR_2 = 0.1636$                                  |
| Final R indexes [all data]                     | $R_1 = 0.1529$ , $wR_2 = 0.1985$                                  |
| Largest diff. peak/hole / e Å <sup>-3</sup>    | 0.49/-0.55                                                        |



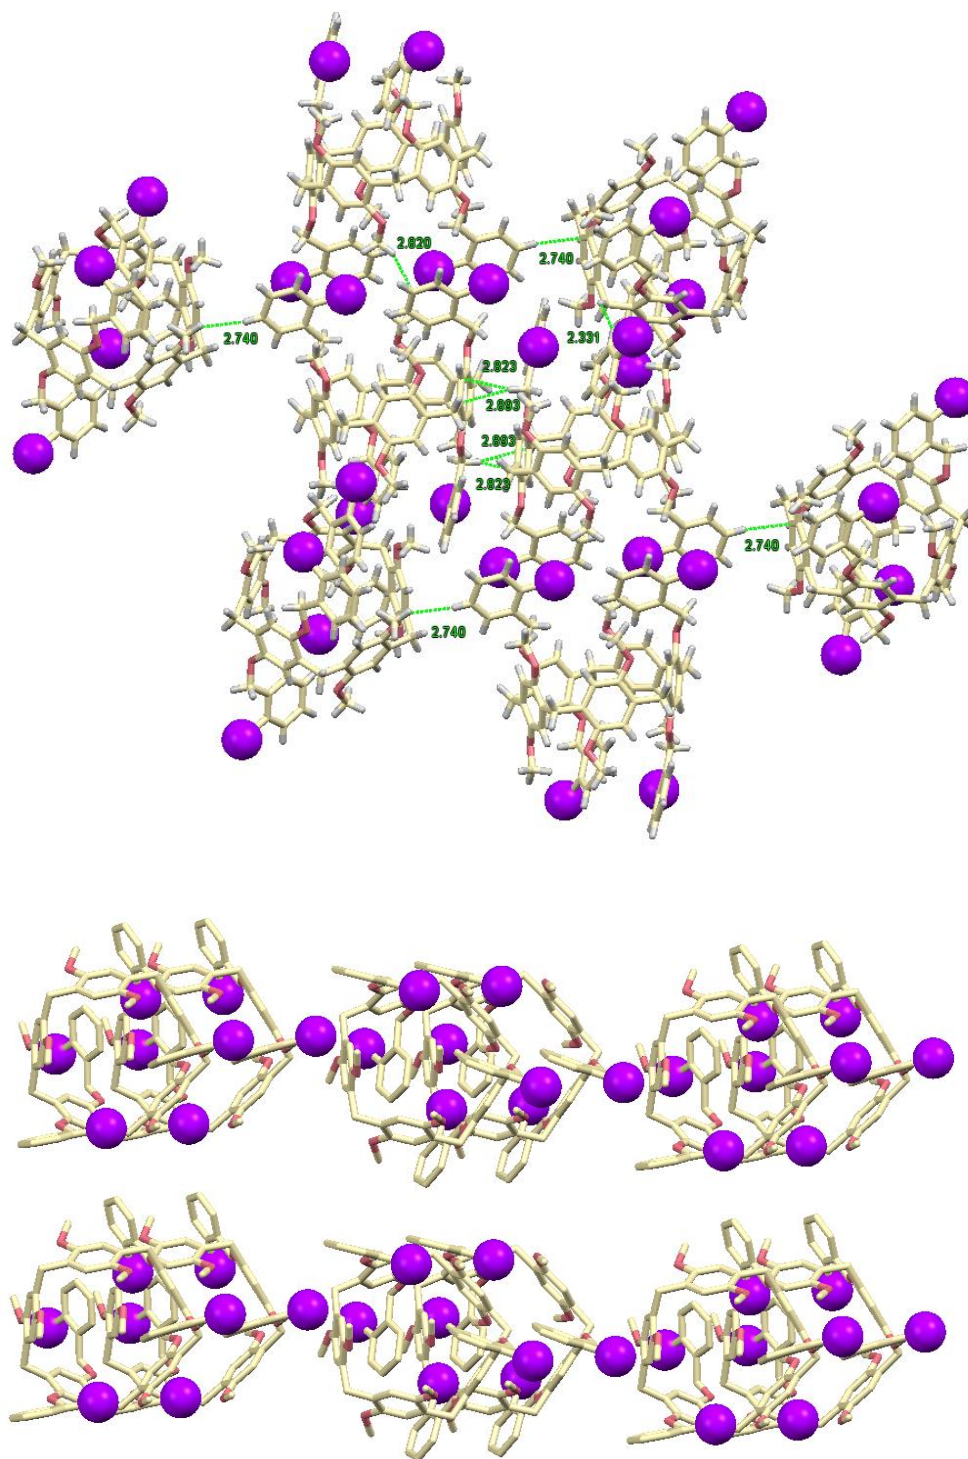

Figure S45. The front view (top) and top view (bottom) of the X-ray structure of **P5**

|                                             |                                                                 |
|---------------------------------------------|-----------------------------------------------------------------|
| CCDC                                        | 2323543                                                         |
| Empirical formula                           | C <sub>69</sub> H <sub>62</sub> Br <sub>4</sub> O <sub>10</sub> |
| Formula weight                              | 1370.869                                                        |
| Temperature/K                               | 103                                                             |
| Crystal system                              | monoclinic                                                      |
| Space group                                 | P2 <sub>1</sub> /c                                              |
| a/Å                                         | 12.77605(6)                                                     |
| b/Å                                         | 14.68348(8)                                                     |
| c/Å                                         | 33.83251(18)                                                    |
| α/°                                         | 90                                                              |
| β/°                                         | 98.6321(4)                                                      |
| γ/°                                         | 90                                                              |
| Volume/Å <sup>3</sup>                       | 6274.98(6)                                                      |
| Z                                           | 4                                                               |
| ρ <sub>calc</sub> /cm <sup>3</sup>          | 1.451                                                           |
| μ/mm <sup>-1</sup>                          | 3.600                                                           |
| F(000)                                      | 2780.7                                                          |
| Crystal size/mm <sup>3</sup>                | 0.362 × 0.348 × 0.147                                           |
| Radiation                                   | Cu Kα (λ = 1.54184)                                             |
| 2θ range for data collection/°              | 5.28 to 151.62                                                  |
| Index ranges                                | -15 ≤ h ≤ 16, -17 ≤ k ≤ 17, -42 ≤ l ≤ 42                        |
| Reflections collected                       | 95130                                                           |
| Independent reflections                     | 12878 [R <sub>int</sub> = 0.0212, R <sub>sigma</sub> = 0.0112]  |
| Data/restraints/parameters                  | 12878/0/754                                                     |
| Goodness-of-fit on F <sup>2</sup>           | 1.032                                                           |
| Final R indexes [I ≥ 2σ (I)]                | R <sub>1</sub> = 0.0350, wR <sub>2</sub> = 0.0875               |
| Final R indexes [all data]                  | R <sub>1</sub> = 0.0352, wR <sub>2</sub> = 0.0876               |
| Largest diff. peak/hole / e Å <sup>-3</sup> | 1.20/-1.29                                                      |

## 7 Chiral guest induces P4-P5.

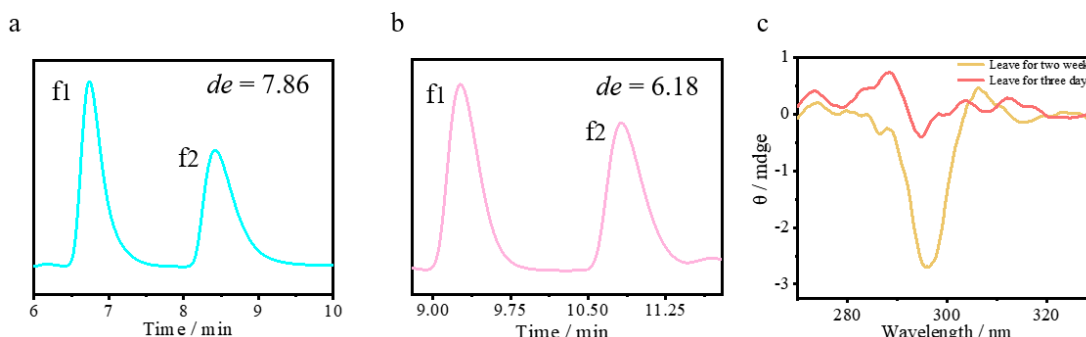

Figure S46. The Chiral HPLC traces of **P5** in (S)-1-chloro-2-methylbutane for two weeks (a) and (b) after removing the (S)-1-chloro-2-methylbutane (DCM: hexane, 1:3 (v/v)), (c) the CD spectral of 100 μl a saturated of **P5** in (S)-1-chloro-2-methylbutane to 2 ml chloroform.

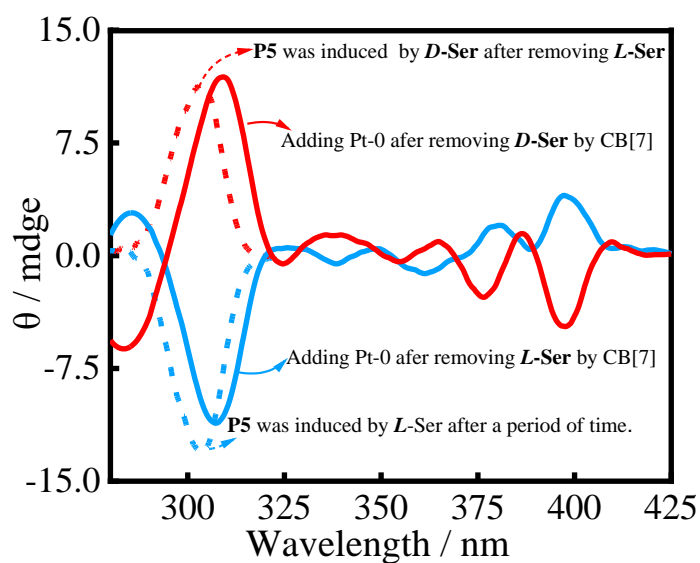

Figure S47. CD spectra of 1 equiv *L*-Ser induced **P5** (0.05 mM) (blue dotted line) and then removing *L*-Ser by CB[7] and adding **Pt-0** (blue solid line); CD spectra of **P5** was induced by *D*-Ser after removing *L*-Ser (red dotted line) and then removing *D*-Ser by CB[7] and adding **Pt-0** (red solid line), All the measurements were carried out in chloroform at 25 °C.

### 8 Calculations for Complexation Between the **P5<sub>RS</sub>** and *L*-Ser.

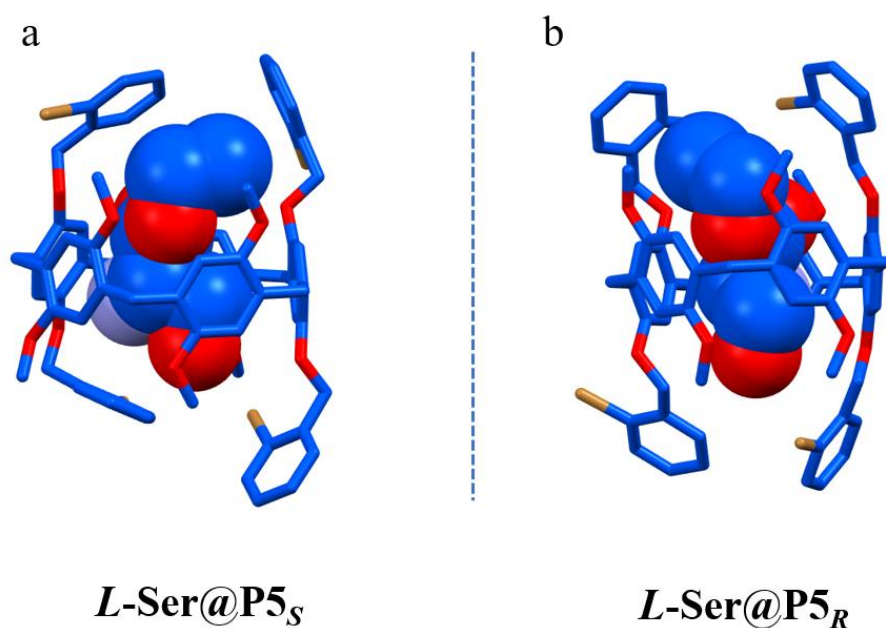

$$E_a - E_b = -8.24 \text{ kcal/mol}$$

Fig. S48 The calculated optimal structure of enantiomeric complexes of (a) *L*-Ser@**P5<sub>S</sub>**, (b) *L*-Ser@**P5<sub>R</sub>**. Color code: blue for carbon, red for oxygen, purple for nitrogen, and yellow for bromine atoms. Hydrogen atoms were omitted for clarity. Calculated structure of complex *L*-Ser@**P5<sub>S</sub>** and *L*-Ser@**P5<sub>R</sub>** at B3LYP/6-31G(d) level.

The atomic coordinates of *L*-Ser@P5s.

|   |          |          |          |
|---|----------|----------|----------|
| C | -2.8194  | 0.88933  | 1.58716  |
| C | -1.63904 | 1.53776  | 0.8892   |
| O | -0.5358  | 0.92733  | 1.26023  |
| C | 0.68414  | 1.13459  | 0.47583  |
| O | -1.77522 | 2.42239  | 0.06299  |
| C | 0.93676  | -0.13733 | -0.29737 |
| H | -2.66936 | 0.83631  | 2.667    |
| H | 0.53344  | 1.99796  | -0.1661  |
| H | 1.45846  | 1.34527  | 1.20979  |
| H | 1.03675  | -0.98885 | 0.37921  |
| H | 0.11856  | -0.33641 | -0.98874 |
| H | 1.85037  | -0.04457 | -0.88694 |
| C | 0.23141  | 2.45713  | 4.00802  |
| C | 1.03206  | 1.45507  | 4.56026  |
| C | 2.40439  | 1.46379  | 4.27445  |
| C | 2.9327   | 2.41139  | 3.3921   |
| C | 2.12685  | 3.39274  | 2.81132  |
| C | 0.76771  | 3.4337   | 3.16641  |
| O | 0.02318  | 4.47278  | 2.65588  |
| O | 3.16115  | 0.498    | 4.89186  |
| C | -1.18278 | 4.79101  | 3.3354   |
| C | 4.56339  | 0.71617  | 4.97588  |
| C | 1.3193   | 4.7383   | -0.2672  |
| C | 2.36444  | 4.07275  | 0.38005  |
| C | 3.06661  | 3.08246  | -0.3303  |
| C | 2.70822  | 2.77802  | -1.64414 |
| C | 1.65016  | 3.43025  | -2.2832  |
| C | 0.96609  | 4.43686  | -1.58714 |
| O | 0.00151  | 5.09224  | -2.31594 |
| O | 4.07215  | 2.42553  | 0.3463   |
| C | -0.84354 | 6.07497  | -1.73308 |
| C | 5.15032  | 1.9308   | -0.45105 |
| C | 2.70543  | 4.39095  | 1.82571  |
| C | -0.65419 | 1.345    | -3.30637 |
| C | 0.6776   | 1.57791  | -3.65206 |
| C | 1.5051   | 0.47724  | -3.91576 |
| C | 0.99496  | -0.82111 | -3.82974 |
| C | -0.33363 | -1.05607 | -3.46504 |
| C | -1.16314 | 0.04787  | -3.20706 |
| O | -2.46638 | -0.22233 | -2.85396 |
| O | 2.80723  | 0.76691  | -4.24786 |
| C | -3.33821 | 0.89313  | -2.71265 |
| C | 3.71425  | -0.32149 | -4.35973 |
| C | 1.21718  | 2.99557  | -3.6737  |
| C | -2.25379 | -3.07082 | -1.29759 |
| C | -1.00436 | -2.93981 | -1.89166 |
| C | 0.12755  | -3.24492 | -1.10852 |
| C | -0.01317 | -3.70379 | 0.19782  |
| C | -1.27654 | -3.83611 | 0.79396  |
| C | -2.3932  | -3.50474 | 0.02616  |

|    |          |          |          |
|----|----------|----------|----------|
| O  | -3.65542 | -3.50751 | 0.62791  |
| O  | 1.33829  | -3.02148 | -1.69709 |
| C  | -4.65078 | -4.37797 | 0.04314  |
| C  | 2.50401  | -3.47624 | -1.01339 |
| C  | -0.85068 | -2.47543 | -3.32763 |
| C  | -1.80914 | -2.1172  | 3.58515  |
| C  | -0.90205 | -3.07964 | 3.14562  |
| C  | 0.4566   | -2.91601 | 3.47766  |
| C  | 0.87261  | -1.79743 | 4.20403  |
| C  | -0.04157 | -0.82612 | 4.63454  |
| C  | -1.39277 | -0.99609 | 4.30939  |
| O  | -2.27197 | -0.00085 | 4.69842  |
| O  | 1.305    | -3.91038 | 3.06048  |
| C  | -3.61864 | -0.3973  | 4.97705  |
| C  | 2.65919  | -3.86964 | 3.503    |
| C  | 0.42817  | 0.37521  | 5.43488  |
| C  | -1.37184 | -4.22131 | 2.26037  |
| C  | -2.11202 | 5.50252  | -1.14185 |
| C  | 6.12424  | 1.18177  | 0.41243  |
| C  | 6.88577  | 0.13851  | -0.12931 |
| C  | 7.74294  | -0.62483 | 0.66253  |
| C  | 7.84788  | -0.35637 | 2.02765  |
| C  | 7.10561  | 0.6792   | 2.59535  |
| C  | 6.26684  | 1.43726  | 1.78181  |
| C  | -2.43608 | 5.73456  | 0.19769  |
| C  | -3.64841 | 5.30958  | 0.74053  |
| C  | -4.56622 | 4.63158  | -0.06374 |
| C  | -4.25851 | 4.36308  | -1.39986 |
| C  | -3.04262 | 4.80157  | -1.91826 |
| C  | -5.99815 | -3.90236 | 0.50713  |
| C  | 3.71933  | -3.16489 | -1.84349 |
| C  | -6.58522 | -2.72818 | 0.01548  |
| C  | -7.81292 | -2.2647  | 0.47734  |
| C  | -8.48752 | -2.99261 | 1.45867  |
| C  | -7.92988 | -4.16504 | 1.9686   |
| C  | -6.6948  | -4.6069  | 1.49609  |
| C  | 4.74058  | -2.38614 | -1.28605 |
| C  | 5.91585  | -2.11164 | -1.98301 |
| C  | 6.08575  | -2.61864 | -3.27154 |
| C  | 5.077    | -3.38447 | -3.85905 |
| C  | 3.91111  | -3.64771 | -3.14297 |
| Br | -2.69641 | 4.47442  | -3.76966 |
| Br | 5.27166  | 2.85311  | 2.60336  |
| Br | -5.68171 | -1.69533 | -1.32888 |
| Br | 2.54566  | -4.67405 | -4.00542 |
| H  | -0.8249  | 2.45731  | 4.25205  |
| H  | 3.98124  | 2.38835  | 3.12337  |
| H  | -1.47545 | 5.78494  | 2.99537  |
| H  | -1.98427 | 4.08217  | 3.09447  |
| H  | -1.03314 | 4.80786  | 4.4211   |
| H  | 4.95327  | -0.08148 | 5.61072  |

|   |          |          |          |
|---|----------|----------|----------|
| H | 5.041    | 0.65591  | 3.99531  |
| H | 4.78281  | 1.69116  | 5.42783  |
| H | 0.76937  | 5.47793  | 0.30047  |
| H | 3.22398  | 2.00878  | -2.20344 |
| H | -1.1045  | 6.73428  | -2.56642 |
| H | -0.31145 | 6.67223  | -0.98756 |
| H | 5.66246  | 2.7645   | -0.94487 |
| H | 4.75939  | 1.26515  | -1.22835 |
| H | 2.32685  | 5.3908   | 2.05914  |
| H | 3.7927   | 4.41072  | 1.9455   |
| H | -1.28359 | 2.2049   | -3.12281 |
| H | 1.6279   | -1.67892 | -4.01632 |
| H | -4.31567 | 0.47886  | -2.46354 |
| H | -3.00528 | 1.55757  | -1.90793 |
| H | -3.40717 | 1.47554  | -3.63845 |
| H | 4.69231  | 0.11895  | -4.55788 |
| H | 3.75168  | -0.89393 | -3.42962 |
| H | 3.44353  | -0.9904  | -5.1856  |
| H | 0.43861  | 3.66925  | -4.03385 |
| H | 2.06466  | 3.05612  | -4.36209 |
| H | -3.13342 | -2.77888 | -1.85802 |
| H | 0.8533   | -3.93527 | 0.80214  |
| H | -4.57444 | -4.34127 | -1.0469  |
| H | -4.4631  | -5.40406 | 0.37487  |
| H | 2.59341  | -2.97071 | -0.04562 |
| H | 2.42202  | -4.55743 | -0.83566 |
| H | -1.8226  | -2.5623  | -3.82373 |
| H | -0.15208 | -3.14714 | -3.83685 |
| H | -2.85419 | -2.23543 | 3.32317  |
| H | 1.91648  | -1.65679 | 4.45552  |
| H | -4.0808  | 0.45115  | 5.48543  |
| H | -4.17007 | -0.61857 | 4.05715  |
| H | -3.63452 | -1.2748  | 5.6332   |
| H | 3.12241  | -4.78122 | 3.12259  |
| H | 3.17775  | -2.99695 | 3.09613  |
| H | 2.7172   | -3.85606 | 4.59801  |
| H | 1.17511  | 0.04712  | 6.16236  |
| H | -0.42158 | 0.78725  | 5.98337  |
| H | -2.40687 | -4.46962 | 2.50481  |
| H | -0.7569  | -5.10679 | 2.44409  |
| H | 6.7911   | -0.07648 | -1.18991 |
| H | 8.3198   | -1.42886 | 0.21709  |
| H | 8.50285  | -0.95117 | 2.65657  |
| H | 7.17793  | 0.89623  | 3.6549   |
| H | -1.72753 | 6.28005  | 0.81272  |
| H | -3.88403 | 5.52466  | 1.77806  |
| H | -5.53306 | 4.33259  | 0.33247  |
| H | -4.96497 | 3.84774  | -2.04097 |
| H | -8.23714 | -1.35268 | 0.07308  |
| H | -9.44801 | -2.63804 | 1.8195   |
| H | -8.45179 | -4.73154 | 2.73301  |

|   |          |          |          |
|---|----------|----------|----------|
| H | -6.25305 | -5.51534 | 1.89555  |
| H | 4.58365  | -1.97664 | -0.29651 |
| H | 6.68461  | -1.49918 | -1.52256 |
| H | 6.99385  | -2.41427 | -3.83019 |
| H | 5.18962  | -3.77172 | -4.86528 |
| N | -4.04771 | 1.70732  | 1.30443  |
| H | -4.84092 | 1.07089  | 1.13997  |
| H | -4.2919  | 2.32658  | 2.08144  |
| H | -3.87343 | 2.30647  | 0.4786   |
| C | -3.03223 | -0.50745 | 1.01377  |
| H | -3.08674 | -0.47677 | -0.08328 |
| H | -2.17027 | -1.11321 | 1.29775  |
| O | -4.24235 | -0.98499 | 1.57048  |
| H | -4.31528 | -1.91675 | 1.27125  |

The atomic coordinates of *L-Ser@P5<sub>R</sub>*.

|   |         |         |         |
|---|---------|---------|---------|
| C | 1.6393  | 1.5671  | -2.3512 |
| C | 0.4594  | 1.4816  | -3.0042 |
| C | -0.6466 | 1.9595  | -2.4016 |
| C | -0.6705 | 2.4704  | -1.1538 |
| C | 0.4931  | 2.4451  | -0.4662 |
| C | 1.6047  | 2.0031  | -1.0781 |
| C | 1.4517  | 1.191   | 2.5737  |
| C | 0.3936  | 1.8131  | 2.0097  |
| C | -0.8474 | 1.455   | 2.3865  |
| C | -1.1281 | 0.4897  | 3.2848  |
| C | -0.0689 | -0.1093 | 3.8717  |
| C | 1.1722  | 0.2638  | 3.5113  |
| C | 0.577   | 2.9241  | 0.9779  |
| C | 0.8476  | -3.2892 | 4.0625  |
| C | -0.2823 | -2.5741 | 4.2559  |
| C | -1.457  | -3.0516 | 3.8074  |
| C | -1.5824 | -4.1736 | 3.072   |
| C | -0.4421 | -4.8505 | 2.8123  |
| C | 0.7209  | -4.4101 | 3.3249  |
| C | -0.2485 | -1.2058 | 4.9231  |
| C | 0.8246  | -5.6293 | -0.205  |
| C | -0.3587 | -5.7259 | 0.4405  |
| C | -1.4976 | -5.5038 | -0.2402 |
| C | -1.5535 | -5.1555 | -1.5397 |
| C | -0.3763 | -5.1062 | -2.1968 |
| C | 0.7607  | -5.3417 | -1.5204 |
| C | -0.4376 | -6.0857 | 1.9216  |
| C | 1.1337  | -2.7775 | -3.99   |
| C | -0.1078 | -3.307  | -3.946  |
| C | -1.1813 | -2.5155 | -4.124  |
| C | -1.1118 | -1.1803 | -4.2936 |
| C | 0.1282  | -0.6437 | -4.2898 |
| C | 1.2007  | -1.4483 | -4.1842 |
| C | 0.3439  | 0.8598  | -4.3956 |
| C | -0.3126 | -4.7907 | -3.6879 |

|    |         |         |         |
|----|---------|---------|---------|
| O  | 2.2342  | -3.5939 | -3.8698 |
| C  | 3.5003  | -3.1125 | -4.255  |
| O  | -2.2043 | -0.3557 | -4.4288 |
| C  | -3.4834 | -0.9189 | -4.5953 |
| O  | 2.0021  | -5.8152 | 0.4843  |
| C  | 3.2285  | -5.5389 | -0.1678 |
| O  | -2.7053 | -4.8578 | -2.2231 |
| C  | -3.9601 | -4.8571 | -1.5727 |
| O  | 2.0479  | -2.8005 | 4.5211  |
| C  | 3.2467  | -3.372  | 4.0515  |
| O  | -2.7781 | -4.6318 | 2.5736  |
| C  | -3.9822 | -4.0795 | 3.052   |
| O  | 2.7257  | 1.5626  | 2.2146  |
| C  | 3.8132  | 1.1577  | 3.0129  |
| O  | 2.7948  | 1.0397  | -2.864  |
| C  | 3.533   | 1.8758  | -3.7311 |
| O  | -1.794  | 2.9428  | -0.5169 |
| C  | -3.0787 | 2.7546  | -1.0691 |
| O  | -2.4019 | 0.1203  | 3.6487  |
| C  | -3.5012 | 0.8638  | 3.1765  |
| C  | 4.4243  | -5.5216 | 0.7726  |
| C  | -4.9976 | -4.1507 | -2.4353 |
| C  | 5.6006  | -4.9557 | 0.429   |
| C  | 6.6386  | -4.9401 | 1.2836  |
| C  | 6.5222  | -5.493  | 2.4989  |
| C  | 5.3642  | -6.0675 | 2.853   |
| C  | 4.3336  | -6.0797 | 1.9952  |
| C  | -5.9499 | -3.3254 | -1.9503 |
| C  | -6.8217 | -2.7199 | -2.776  |
| C  | -6.763  | -2.9252 | -4.0999 |
| C  | -5.8283 | -3.7463 | -4.5959 |
| C  | -4.9621 | -4.3484 | -3.7678 |
| C  | 4.5103  | 2.7707  | -2.9904 |
| C  | -3.7128 | 3.8999  | -1.8577 |
| C  | 4.2492  | 4.0896  | -2.908  |
| C  | 5.0953  | 4.9373  | -2.3098 |
| C  | 6.2336  | 4.4719  | -1.7715 |
| C  | 6.5109  | 3.1635  | -1.8354 |
| C  | 5.6566  | 2.3194  | -2.4443 |
| C  | -5.0582 | 3.8456  | -1.9537 |
| C  | -5.7837 | 4.7826  | -2.5812 |
| C  | -5.1637 | 5.8234  | -3.1486 |
| C  | -3.8271 | 5.9003  | -3.0788 |
| C  | -3.1055 | 4.9587  | -2.4409 |
| Br | 5.8782  | -4.1522 | -1.2706 |
| Br | -6.1351 | -2.9458 | -0.0966 |
| Br | 6.1406  | 0.4825  | -2.4923 |
| Br | -1.2331 | 5.2758  | -2.4853 |
| H  | -1.5783 | 1.9146  | -2.9848 |
| H  | 2.5433  | 1.9908  | -0.5029 |
| H  | -1.6756 | 1.9965  | 1.9094  |



|   |         |         |         |
|---|---------|---------|---------|
| H | 2.002   | -0.2448 | 4.0211  |
| H | -0.1714 | 3.7282  | 1.1641  |
| H | 1.5433  | 3.4562  | 1.1317  |
| H | -2.348  | -2.4423 | 4.0148  |
| H | 1.6161  | -5.001  | 3.0849  |
| H | -1.1732 | -1.0387 | 5.5202  |
| H | 0.5636  | -1.1537 | 5.6826  |
| H | -2.4345 | -5.6107 | 0.3219  |
| H | 1.6872  | -5.2884 | -2.1075 |
| H | -1.3397 | -6.7072 | 2.1227  |
| H | 0.4004  | -6.7666 | 2.1948  |
| H | -2.167  | -3.0018 | -4.089  |
| H | 2.1912  | -0.9779 | -4.2375 |
| H | 1.2427  | 1.0659  | -5.0159 |
| H | -0.4733 | 1.3458  | -4.9744 |
| H | -1.2281 | -5.1526 | -4.2078 |
| H | 0.4911  | -5.3904 | -4.172  |
| H | 4.2111  | -3.9679 | -4.2128 |
| H | 3.4714  | -2.733  | -5.3004 |
| H | 3.8573  | -2.336  | -3.5434 |
| H | -4.2023 | -0.0837 | -4.7499 |
| H | -3.5038 | -1.574  | -5.4942 |
| H | -3.7909 | -1.4648 | -3.6761 |
| H | 3.4064  | -6.3148 | -0.9482 |
| H | 3.1449  | -4.5265 | -0.6225 |
| H | -4.2736 | -5.9076 | -1.3781 |
| H | -3.8475 | -4.3112 | -0.6148 |
| H | 4.0913  | -2.7715 | 4.4578  |
| H | 3.3525  | -4.4127 | 4.4297  |
| H | 3.2922  | -3.3234 | 2.9406  |
| H | -4.8199 | -4.6618 | 2.6067  |
| H | -4.0396 | -4.1768 | 4.159   |
| H | -4.0873 | -3.0228 | 2.72    |
| H | 4.7303  | 1.6397  | 2.6063  |
| H | 3.6706  | 1.5032  | 4.0611  |
| H | 3.9552  | 0.0559  | 2.9519  |
| H | 4.0905  | 1.2202  | -4.4385 |
| H | 2.8389  | 2.4646  | -4.3703 |
| H | -3.7244 | 2.6256  | -0.1649 |
| H | -3.1617 | 1.778   | -1.5912 |
| H | -4.4216 | 0.4186  | 3.6169  |
| H | -3.4273 | 1.921   | 3.5153  |
| H | -3.5827 | 0.785   | 2.0693  |
| H | 7.6017  | -4.4778 | 1.0071  |
| H | 7.372   | -5.4812 | 3.2015  |
| H | 5.2614  | -6.528  | 3.8498  |
| H | 3.3998  | -6.5638 | 2.3231  |
| H | -7.6017 | -2.0425 | -2.3885 |
| H | -7.477  | -2.4273 | -4.7775 |
| H | -5.7735 | -3.9242 | -5.6826 |
| H | -4.2061 | -5.0187 | -4.2103 |

|   |         |         |         |
|---|---------|---------|---------|
| H | 3.3255  | 4.495   | -3.3522 |
| H | 4.8572  | 6.0132  | -2.267  |
| H | 6.9352  | 5.1659  | -1.2805 |
| H | 7.4529  | 2.8019  | -1.3865 |
| H | -5.607  | 3.0042  | -1.497  |
| H | -6.882  | 4.7003  | -2.6285 |
| H | -5.7454 | 6.603   | -3.6679 |
| H | -3.3455 | 6.7666  | -3.565  |
| O | -3.2516 | -1.4798 | -0.9991 |
| C | -2.3962 | -1.7273 | 0.0921  |
| C | -1.1226 | -0.9183 | -0.1474 |
| C | 0.0924  | -1.4282 | 0.5852  |
| O | 1.2251  | -0.9617 | 0.0074  |
| C | 2.4119  | -1.5913 | 0.4147  |
| O | 0.0525  | -2.2161 | 1.499   |
| N | -0.8483 | -1.0607 | -1.6186 |
| C | 3.5845  | -1.0586 | -0.3909 |
| H | -3.9238 | -2.1558 | -1.1249 |
| H | -2.9174 | -1.4396 | 1.0308  |
| H | -2.1917 | -2.819  | 0.1058  |
| H | -1.2855 | 0.1564  | 0.0818  |
| H | 2.582   | -1.3965 | 1.4977  |
| H | 2.3121  | -2.6874 | 0.244   |
| H | 0.0662  | -0.6147 | -1.8529 |
| H | -0.8137 | -2.0767 | -1.8604 |
| H | -1.6065 | -0.5929 | -2.1597 |
| H | 3.4421  | -1.2847 | -1.4708 |
| H | 3.6973  | 0.039   | -0.2631 |
| H | 4.5388  | -1.5211 | -0.0537 |

1. J. Ji, X. Wei, W. Wu, C. Fan, D. Zhou, K. Kanagaraj, G. Cheng, K. Luo, X. G. Meng and C. Yang, *J. Am. Chem. Soc.*, 2022, **144**, 1455-1463.
